# Supplementary material for: Neutral and ionic Co(ii) metal–organic frameworks with 2-methylimidazole and trimesate: design and evaluation for molecule encapsulation and slow release
Source: Royal Society of Chemistry journal article supplement (doi:10.1039/d4dt02679a), 2025-01-01
Supplement: d4dt02679a1.pdf [file d4dt02679a1.pdf]

# Neutral and Ionic Co(II) Metal-Organic Frameworks with 2-Methylimidazole and Trimesate: Design and Evaluation for Molecule Encapsulation and Slow Release

Jose de Jesus Velazquez Garcia,<sup>\*a</sup> Luis de los Santos Valladares,<sup>b,c</sup> Crispin H. W. Barnes,<sup>b</sup> Sandra König,<sup>d</sup> Michael Fröba,<sup>d</sup> Volodymyr Baran,<sup>a</sup> Bassima Knjo,<sup>e</sup> Faegheh Khademhir,<sup>e</sup> Aliyenur Ekineken,<sup>e</sup> Fabienne Hain,<sup>e</sup> Evke Carstens,<sup>e</sup> Tom Spillner,<sup>e</sup> Lina Asprilla Herrera,<sup>f</sup> Weronika Łukaszczyk,<sup>g</sup> and Simone Techert<sup>a,h</sup>

<sup>a</sup>Photon Science - Structural Dynamics in Chemical Systems, Deutsches Elektronen-Synchrotron DESY, Notkestr. 85, 22607 Hamburg, Germany

<sup>b</sup>Cavendish Laboratory, Department of Physics, University of Cambridge, CB3 0HE Cambridge, United Kingdom.

<sup>c</sup>Laboratorio de Ceramicos y Nanomateriales, Facultad de Ciencias Fisicas, Universidad Nacional Mayor de San Marcos, 14-0149, Lima, Peru.

<sup>d</sup>Institute of Inorganic and Applied Chemistry, University of Hamburg, 20146 Hamburg, Germany.

<sup>e</sup>BS 06 Berufliche Schule Chemie, Biologie, Pharmazie, Agrarwirtschaft, Ladenbeker Furtweg 151, 21033 Hamburg, Germany.

<sup>f</sup>Department of Chemistry, Faculty of Natural and Exact Sciences, Universidad del Valle, Calle 13 N.º 100-00, 760042 Cali, Colombia.

<sup>g</sup>Faculty of Chemistry, Jagiellonian University in Kraków, Gronostajowa 2, 30-387 Kraków, Poland

<sup>h</sup>Institut für Röntgenphysik, Georg-August-Universität Göttingen, Friedrich-Hund-Platz 1, 37077 Göttingen, Germany.

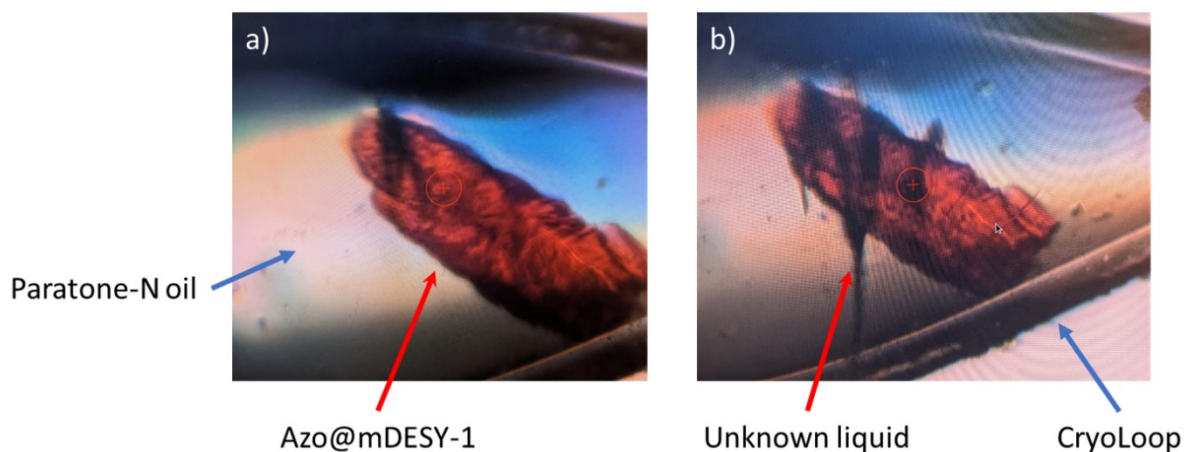

Figure S1. Azo@mDESY-1 mounted on a CryoLoop with paratone-N oil at the P11 beamline: a) before data collection and b) after data collection, showing the leaking of an unidentified liquid.

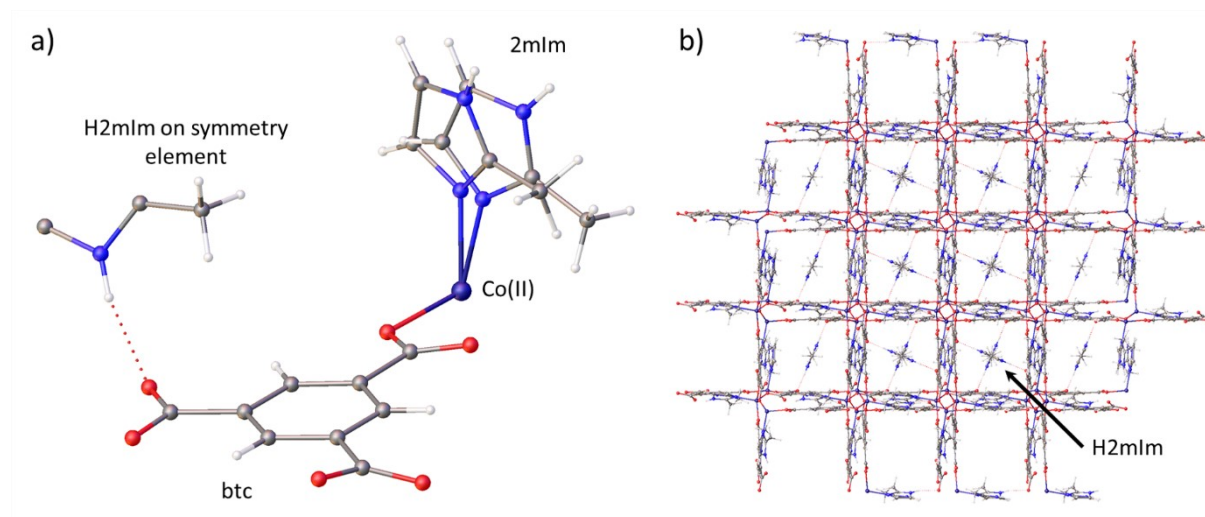

Figure S2. a) Asymmetric unit of mDESY-1 showing a HmIm laying on a symmetry element. b) Packing of mDESY-1 along the *c* axis, showing HmIm ions inside of the pores.

Table S1. Crystal data and Structure refinement parameters of mDESY-1 and mDESY-2 at 100 K.

| Name                        | mDESY-1                                         | mDESY-2                                                                                  |
|-----------------------------|-------------------------------------------------|------------------------------------------------------------------------------------------|
| Temperature                 | 100 K                                           | 100 K                                                                                    |
| Empirical Formula           | $\text{CoC}_{13}\text{H}_9\text{N}_2\text{O}_6$ | $\text{Co}_3\text{C}_{42}\text{H}_{42}\text{N}_{12}\text{O}_{12}, 2(\text{H}_2\text{O})$ |
| Crystal colour/habit        | Violet/Prismatic                                | Violet/Plate                                                                             |
| Crystal size (mm)           | 0.12x0.05x0.02                                  | 0.05x0.05x0.01                                                                           |
| Co-crystallizing solvent    | None                                            | Water                                                                                    |
| Crystal system/ Space group | Tetragonal/ $I4_1/a$                            | Monoclinic/ $C2/c$                                                                       |
| <i>a</i> (Å)                | 17.060 (2)                                      | 31.090 (6)                                                                               |
| <i>b</i> (Å)                | 17.060 (2)                                      | 10.230 (2)                                                                               |
| <i>c</i> (Å)                | 32.36 (7)                                       | 16.130 (3)                                                                               |
| $\alpha$ (°)                | 90                                              | 90                                                                                       |
| $\beta$ (°)                 | 90                                              | 100.29 (3)                                                                               |

|                                                |                                    |                                    |
|------------------------------------------------|------------------------------------|------------------------------------|
| $\gamma$ (°)                                   | 90                                 | 90                                 |
| Volume (Å <sup>3</sup> )                       | 9418 (3)                           | 5047.6 (18)                        |
| Z/Z'                                           | 16/1                               | 4/0.5                              |
| Molecular Weight                               | 348.15                             | 1119.70                            |
| Calculated density (g/cm <sup>3</sup> )        | 0.982                              | 1.473                              |
| F(000)                                         | 2816.0                             | 2300                               |
| Radiation                                      | Synchrotron ( $\lambda=0.61990$ Å) | Synchrotron ( $\lambda=0.61990$ Å) |
| $\theta$ range (°)                             | 1.177/22.630                       | 1.161/24.085                       |
| Scan type                                      | $\phi$                             | $\phi$                             |
| Measured reflections                           | 61623                              | 36613                              |
| Unique reflections                             | 4608                               | 5878                               |
| Observed reflections                           | 3769                               | 4998                               |
| [ F  > 4 $\sigma$ (F)]                         |                                    |                                    |
| Final R (%)                                    | 6.08                               | 5.25                               |
| wR2 (%)                                        | 20.13                              | 0.1516                             |
| Good-of-fit on F <sup>2</sup> (S)              | 1.103                              | 1.040                              |
| $\Delta\rho$ max (e. Å <sup>-3</sup> )         | 0.44                               | 1.160                              |
| $\Delta\rho$ min (e. Å <sup>-3</sup> )         | -0.40                              | -0.806                             |
| No of restrains/parameters                     | 16/256                             | 0/327                              |
| Data [ F  > 4 $\sigma$ (F)]-to-parameter ratio | 14.7:1                             | 18.0:1                             |

Table S2. Crystal data and Structure refinement parameters of mDESY-1, azobenzene and Azo@mDESY-1 at room temperature.

| Name                        | mDESY-1                                                                         | Azobenzene                                     | Azo@mDESY-1              |
|-----------------------------|---------------------------------------------------------------------------------|------------------------------------------------|--------------------------|
| Temperature                 | 290 K                                                                           | 290 K                                          | 290 K                    |
| Empirical Formula           | C <sub>56</sub> H <sub>43</sub> Co <sub>4</sub> N <sub>10</sub> O <sub>24</sub> | C <sub>12</sub> H <sub>10</sub> N <sub>2</sub> |                          |
| Crystal colour/habit        | Purple/Prismatic                                                                | Reddish<br>yellow/Rhombohedral                 | Reddish violet/irregular |
| Crystal size (mm)           | 0.351x0.092x0.08                                                                | 1.00x0.6x0.15                                  | 0.05x0.05x0.05           |
| Co-crystallizing solvent    | None                                                                            | None                                           | None                     |
| Crystal system/ Space group | <i>P</i> -1                                                                     | <i>P</i> 2 <sub>1</sub> / <i>c</i>             | <i>P</i> -1              |
| <i>a</i> (Å)                | 17.290 (2)                                                                      | 15.2146 (14)                                   | 17.0443 (8)              |
| <i>b</i> (Å)                | 17.269 (2)                                                                      | 5.7842 (6)                                     | 17.2874 (7)              |
| <i>c</i> (Å)                | 20.254 (3)                                                                      | 12.1728 (11)                                   | 20.2570(9)               |
| $\alpha$ (°)                | 115.202 (4)                                                                     | 90                                             | 64.843(2)                |
| $\beta$ (°)                 | 115.230 (4)                                                                     | 112.487 (2)                                    | 65.454(2)                |
| $\gamma$ (°)                | 89.994 (5)                                                                      | 90                                             | 89.865(2)                |
| Volume (Å <sup>3</sup> )    | 4826.9 (12)                                                                     | 989.81 (16)                                    | 4803.1(4)                |

| Z/Z'                                    | 2/1               | 4/1               | 2/1               |
|-----------------------------------------|-------------------|-------------------|-------------------|
| Molecular Weight                        | 1475.72           | 182.22            | 1824.17           |
| Calculated density (g/cm <sup>3</sup> ) | 1.015             | 1.223             | 1.261             |
| F(000)                                  | 1498              | 384               | 1870              |
| Radiation                               | Mo K <sub>α</sub> | Mo K <sub>α</sub> | Mo K <sub>α</sub> |
| θ range (°)                             | 1.260/26.485      | 2.898/26.509      | 1.676/23.816      |
| Scan type                               | φ and ω           | φ and ω           | φ and ω           |
| Measured reflections                    | 102405            | 26212             | 50291             |
| Unique reflections                      | 19845             | 2030              | 14704             |
| Observed reflections<br>[ F  > 4σ(F)]   | 15170             | 1745              | 11230             |
| Final R (%)                             | 5.17              | 4.6               | 7.3               |
| wR2 (%)                                 | 16.95             | 13.04             | 22.07             |
| Good-of-fit on F <sup>2</sup> (S)       | 1.022             | 1.089             | 1.036             |
| Δρ max (e. Å <sup>-3</sup> )            | 0.654             | 0.220             | 1.021             |
| Δρ min (e. Å <sup>-3</sup> )            | -0.343            | -0.158            | -1.045            |
| No of restrains/parameters              | 0/907             | 1/142             | 281/1135          |
| Data [  F  > 4σ(F) ]-to-parameter ratio | 16.7:1            | 14.3:1            | 9.9:1             |

Table S3. Selected bond lengths and bond angles for mDESY-1 and mDESY-2 at 100 K.

| mDESY-1 |            |           |            | mDESY-2 |           |           |            |
|---------|------------|-----------|------------|---------|-----------|-----------|------------|
| Co1–O5  | 1.9546(19) | O5–Co1–O1 | 95.83(10)  | Co1–O1  | 1.935 (2) | O1–Co1–O6 | 103.98(9)  |
| Co1–O1  | 1.965(2)   | O5–Co1–O4 | 120.52(9)  | Co1–O6  | 1.961 (2) | O1–Co1–N1 | 108.66(10) |
| Co1–O4  | 1.977(2)   | O1–Co1–O4 | 122.70(11) | Co1–N1  | 1.980 (2) | O1–Co1–N3 | 115.47(10) |
| Co1–N1  | 2.015(5)   | O5–Co1–N1 | 106.8(2)   | Co1–N3  | 1.992 (2) | O6–Co1–N1 | 119.44(10) |
| Co1–N3  | 2.027(10)  | O1–Co1–N1 | 108.9(3)   | Co2–O4  | 1.938 (2) | O6–Co1–N3 | 96.35(9)   |
|         |            | O4–Co1–N1 | 101.3(2)   | Co2–N5  | 1.991 (2) | N1–Co1–N3 | 112.60(10) |
|         |            | O5–Co1–N3 | 93.0(3)    |         |           | O4–Co2–O4 | 115.88(14) |
|         |            | O1–Co1–N3 | 105.7(5)   |         |           | O4–Co2–N5 | 106.61(11) |
|         |            | O4–Co1–N3 | 113.9(4)   |         |           | O4–Co2–N5 | 105.84(11) |
|         |            |           |            |         |           | N5–Co2–N5 | 116.49(17) |

Table S4. Selected bond lengths and bond angles for mDESY-1 in P-1 space group, azobenzene and Azo@mDESY-1 at room temperature.

| mDESY-1 (P-1) |            | Azobenzene  |            | Azo@mDESY-1 |            |
|---------------|------------|-------------|------------|-------------|------------|
| Co1–O19       | 1.968(2)   | C1–C2       | 1.387(2)   | Co1–O24     | 1.994(4)   |
| Co1–O18       | 1.986(2)   | C1–C6       | 1.382(2)   | Co1–O1      | 1.974(4)   |
| Co1–O4        | 1.997(2)   | C10–C11     | 1.365(3)   | Co1–N13     | 2.030(5)   |
| Co1–N12       | 2.014(3)   | C12–C11     | 1.363(3)   | Co1–O11     | 1.986(5)   |
| Co2–O12       | 1.968(2)   | C2–C3       | 1.381(2)   | Co3–O3      | 2.001(4)   |
| Co2–O23       | 1.984(2)   | C3–C4       | 1.382(2)   | Co3–O18     | 1.968(4)   |
| Co2–O15       | 1.993(2)   | C4–C5       | 1.377(3)   | Co3–O21     | 2.004(4)   |
| Co2–N10       | 2.021(3)   | C6–C5       | 1.382(2)   | Co3–N19     | 1.979(4)   |
| Co3–O6        | 1.970(2)   | C7–C8       | 1.384(3)   | Co4–O7      | 1.994(4)   |
| Co3–O7        | 1.984(2)   | C7–C12      | 1.373(3)   | Co4–O19     | 1.963(4)   |
| Co3–O21       | 1.996(2)   | C7–N3       | 1.466(14)  | Co4–O16     | 1.990(4)   |
| Co3–N6        | 2.019(3)   | C8–C9       | 1.379(3)   | Co4–N17     | 2.040(6)   |
| Co4–O14       | 1.967(2)   | C8–N3       | 1.965(17)  | Co2–O13     | 1.981(4)   |
| Co4–O2        | 1.982(2)   | C8–H8       | 0.90(2)    | Co2–O9      | 1.969(4)   |
| Co4–O10       | 1.990(2)   | C9–C10      | 1.378(3)   | Co2–O6      | 1.977(4)   |
| Co4–N8        | 2.021(3)   | N1–N1       | 1.241(2)   | Co2–N15     | 2.037(5)   |
| O19–Co1–O18   | 117.78(10) | N1–C1       | 1.4323(17) | O24–Co1–N13 | 104.50(19) |
| O19–Co1–O4    | 95.98(10)  | N2–N2       | 1.205(5)   | O1–Co1–O24  | 115.44(18) |
| O19–Co1–N12   | 104.40(12) | N2–C7       | 1.456(4)   | O1–Co1–N13  | 104.4(2)   |
| O18–Co1–O4    | 123.68(11) | N3–N3       | 1.38(3)    | O1–Co1–O11  | 93.03(19)  |
| O18–Co1–N12   | 105.12(11) | N1–N1–C1    | 114.01(15) | O11–Co1–O24 | 128.5(2)   |
| O4–Co1–N12    | 108.30(12) | C2–C1–N1    | 123.73(13) | O11–Co1–N13 | 108.7(2)   |
| O12–Co2–O23   | 117.56(10) | C6–C1–N1    | 115.95(13) | O3–Co3–O21  | 125.69(19) |
| O12–Co2–O15   | 95.94(10)  | C6–C1–C2    | 120.28(13) | O18–Co3–O3  | 121.15(18) |
| O12–Co2–N10   | 104.34(12) | C3–C2–C1    | 119.23(14) | O18–Co3–O21 | 94.77(19)  |
| O23–Co2–O15   | 123.66(11) | N2–N2–C7    | 112.1(3)   | O18–Co3–N19 | 99.9(2)    |
| O23–Co2–N10   | 105.41(11) | C1–C6–C5    | 119.86(15) | N19–Co3–O3  | 105.3(2)   |
| O15–Co2–N10   | 108.30(12) | C2–C3–C4    | 120.62(15) | N19–Co3–O21 | 106.8(2)   |
| O6–Co3–O7     | 117.76(10) | C5–C4–C3    | 119.83(14) | O7–Co4–N17  | 103.8(3)   |
| O6–Co3–O21    | 96.24(10)  | C4–C5–C6    | 120.13(15) | O19–Co4–O7  | 122.05(18) |
| O6–Co3–N6     | 104.24(12) | C8–C7–N2    | 127.37(19) | O19–Co4–O16 | 96.81(19)  |
| O7–Co3–O21    | 123.49(11) | C8–C7–N3    | 87.1(7)    | O19–Co4–N17 | 101.0(3)   |
| O7–Co3–N6     | 105.28(12) | C12–C7–N2   | 112.63(19) | O16–Co4–O7  | 122.64(19) |
| O21–Co3–N6    | 108.21(12) | C12–C7–C8   | 120.00(18) | O16–Co4–N17 | 108.2(2)   |
| O14–Co4–O2    | 117.75(10) | C12–C7–N3   | 152.9(7)   | O13–Co2–N15 | 105.98(19) |
| O14–Co4–O10   | 95.88(10)  | C7–C8–N3    | 48.2(4)    | O9–Co2–O13  | 119.02(18) |
| O14–Co4–N8    | 104.32(12) | C7–C8–H8    | 119.7(13)  | O9–Co2–O6   | 95.53(19)  |
| O2–Co4–O10    | 123.79(11) | C9–C8–C7    | 119.34(18) | O9–Co2–N15  | 104.9(2)   |
| O2–Co4–N8     | 105.23(12) | C9–C8–N3    | 167.5(4)   | O6–Co2–O13  | 122.52(19) |
| O10–Co4–N8    | 108.24(12) | C9–C8–H8    | 120.9(13)  | O6–Co2–N15  | 107.3(2)   |
|               |            | N3–C8–H8    | 71.5(14)   |             |            |
|               |            | C11–C12–C7  | 120.05(19) |             |            |
|               |            | C10–C9–C8   | 120.08(19) |             |            |
|               |            | C11–C10–C9  | 119.78(18) |             |            |
|               |            | C12–C11–C10 | 120.75(19) |             |            |
|               |            | C7–N3–C8    | 44.7(5)    |             |            |
|               |            | N3–N3–C7    | 104.7(13)  |             |            |
|               |            | N3–N3–C8    | 148.7(14)  |             |            |

Table S5. Cell and fit parameters obtained from the Le Bail fitting for mDESY-1 measured at P02.1, PETRA III.

| Unit cell parameters |              |              |                | Fit parameters |      |
|----------------------|--------------|--------------|----------------|----------------|------|
| a (Å)                | 17.34550(30) | $\alpha$ (°) | 114.87971(254) | $R_p$          | 9.08 |
| b (Å)                | 17.26511(61) | $\beta$ (°)  | 115.51295(216) | $R_{wp}$       | 8.12 |
| c (Å)                | 20.27012(66) | $\gamma$ (°) | 89.89168(282)  | $R_{exp}$      | 4.22 |
|                      |              |              |                | $\chi^2$       | 3.70 |

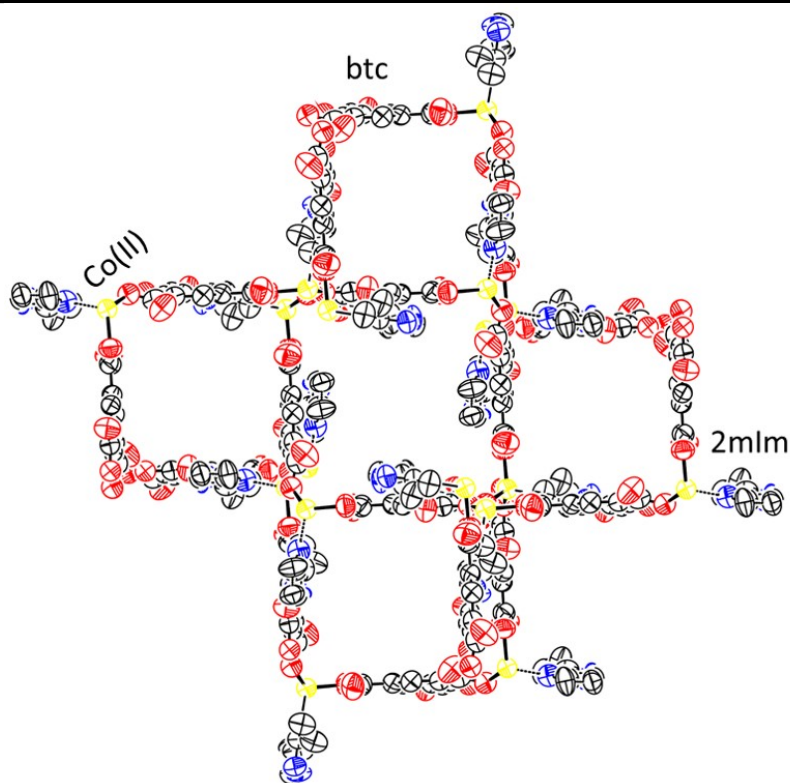

Figure. S3. Thermal ellipsoid plot (50 % of probability) for mDESY-1 at 100 K.

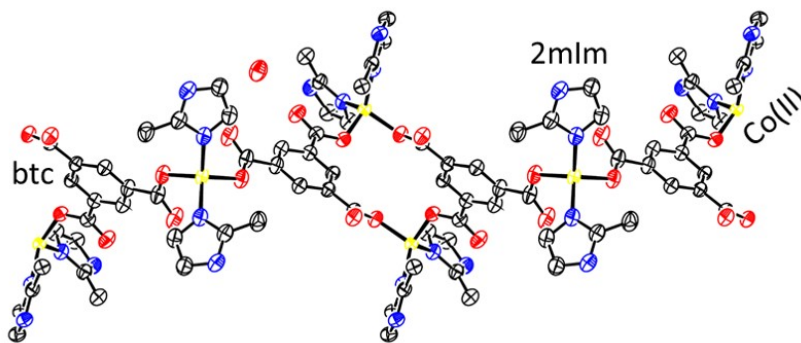

Figure. S4. Thermal ellipsoid plot (50 % of probability) for mDESY-2 at 100 K.

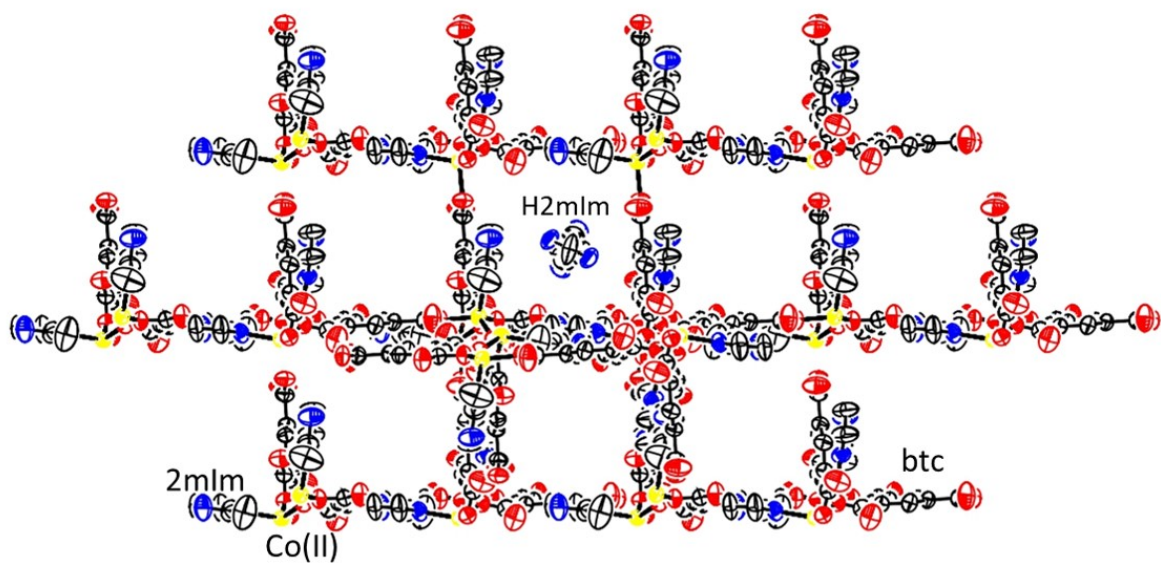

Figure. S5. Thermal ellipsoid plot (50 % of probability) for mDESU-1 in P-1 space group at room temperature.

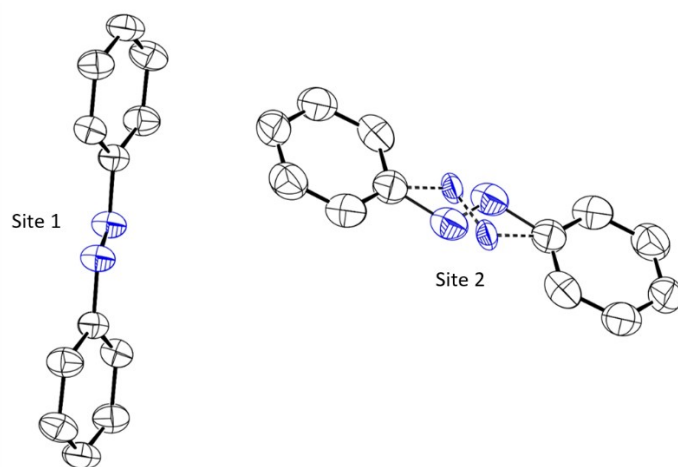

Figure. S6. Thermal ellipsoid plot (50 % of probability) for azobenzene at room temperature.



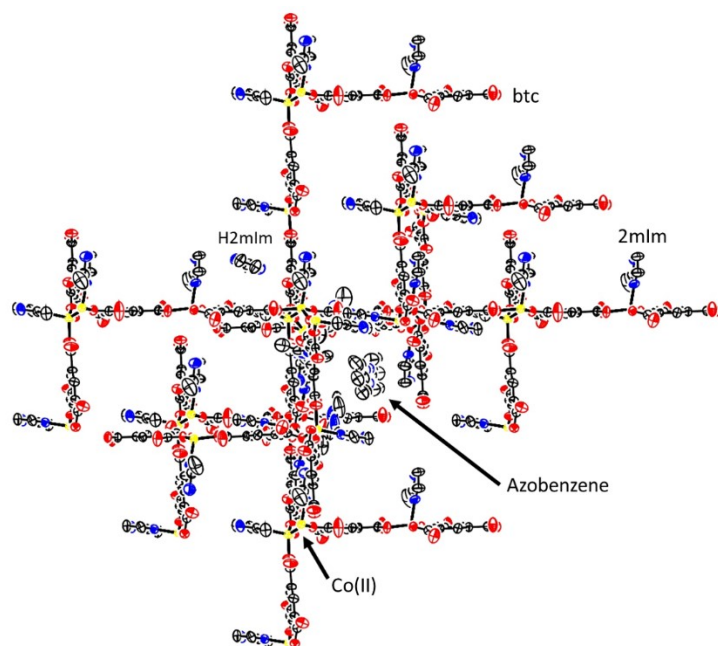

Figure. S7. Thermal ellipsoid plot (50 % of probability) for Azo@mDESYS-1 at room temperature.

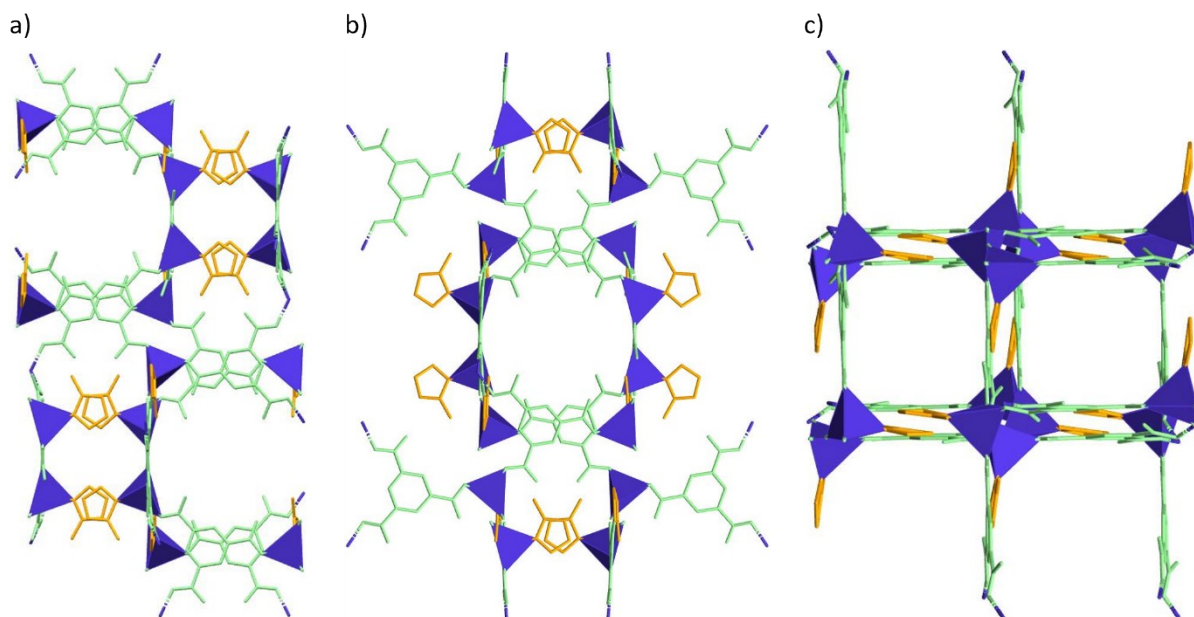

Figure S8. Images of the 3-D mDESYS-1, view down the a-c) a, b and c axis. Neutral mIm ligands are drawn in yellow, btc ligands in light green and cobalt ions are drawn as purple polygons. Hydrogen atoms and counter ions were omitted for clarity.



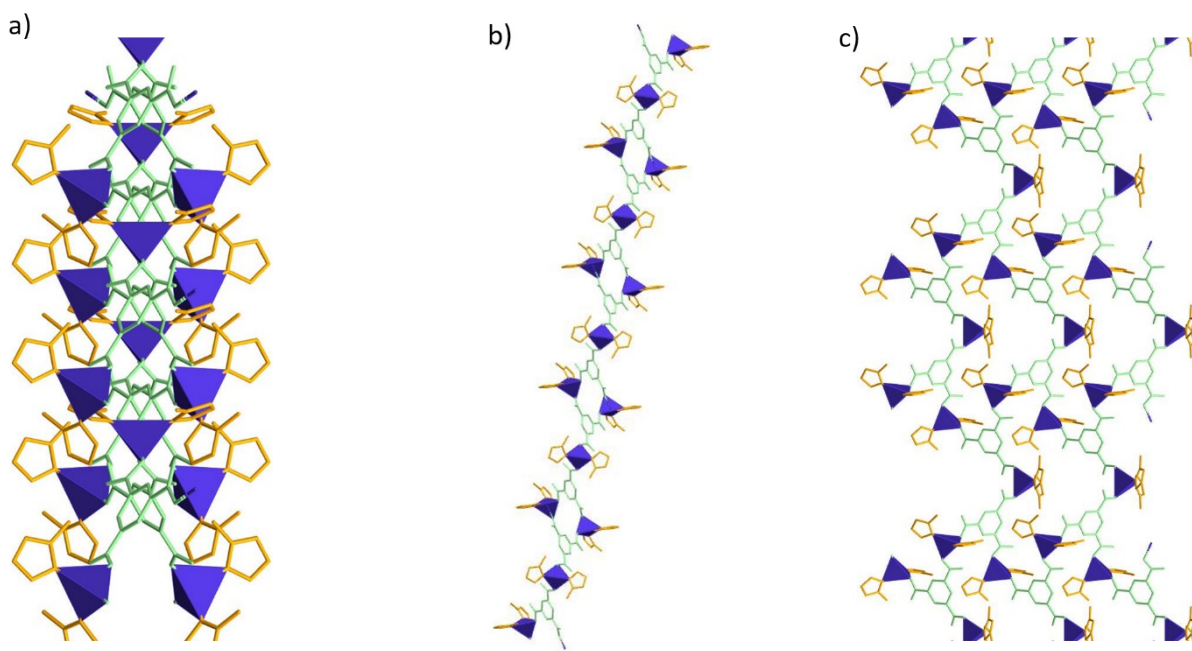

Figure S9. Images of the 2-D mDESX-2, view down the a-c) a, b and c axis. Neutral mIm ligands are drawn in yellow, btc ligands in light green and cobalt ions are drawn as purple polygons. Hydrogen atoms and co-crystallising water were omitted for clarity.

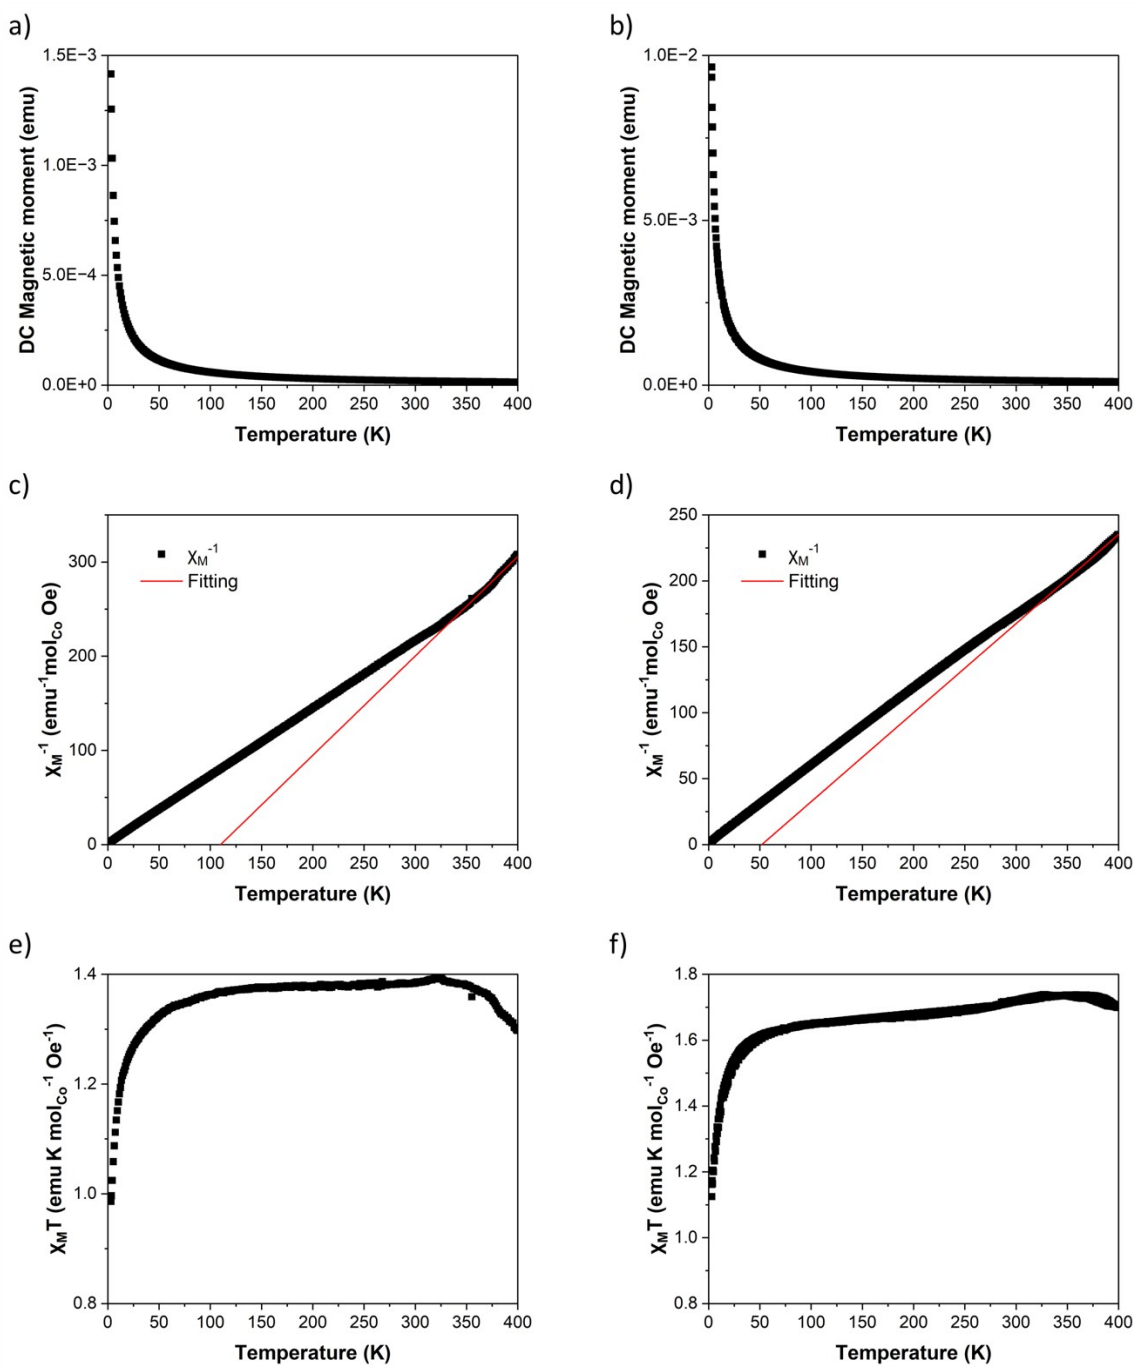

Figure S10. Magnetic characterisation of mDESYS-1 and mDESYS-2 measured at 1 T in the 3 – 400 K temperature range. Temperature dependence of DC magnetic moment for a) mDESYS-1 and b) mDESYS-2. Inverse molar magnetic susceptibility ( $\chi_M^{-1}$ ) vs temperature, including linear extrapolation to the zero level of a possible ferromagnetic ordering, for c) mDESYS-1 and d) mDESYS-2. The  $\chi_M T$  vs temperature plot for e) mDESYS-1 and f) mDESYS-2.

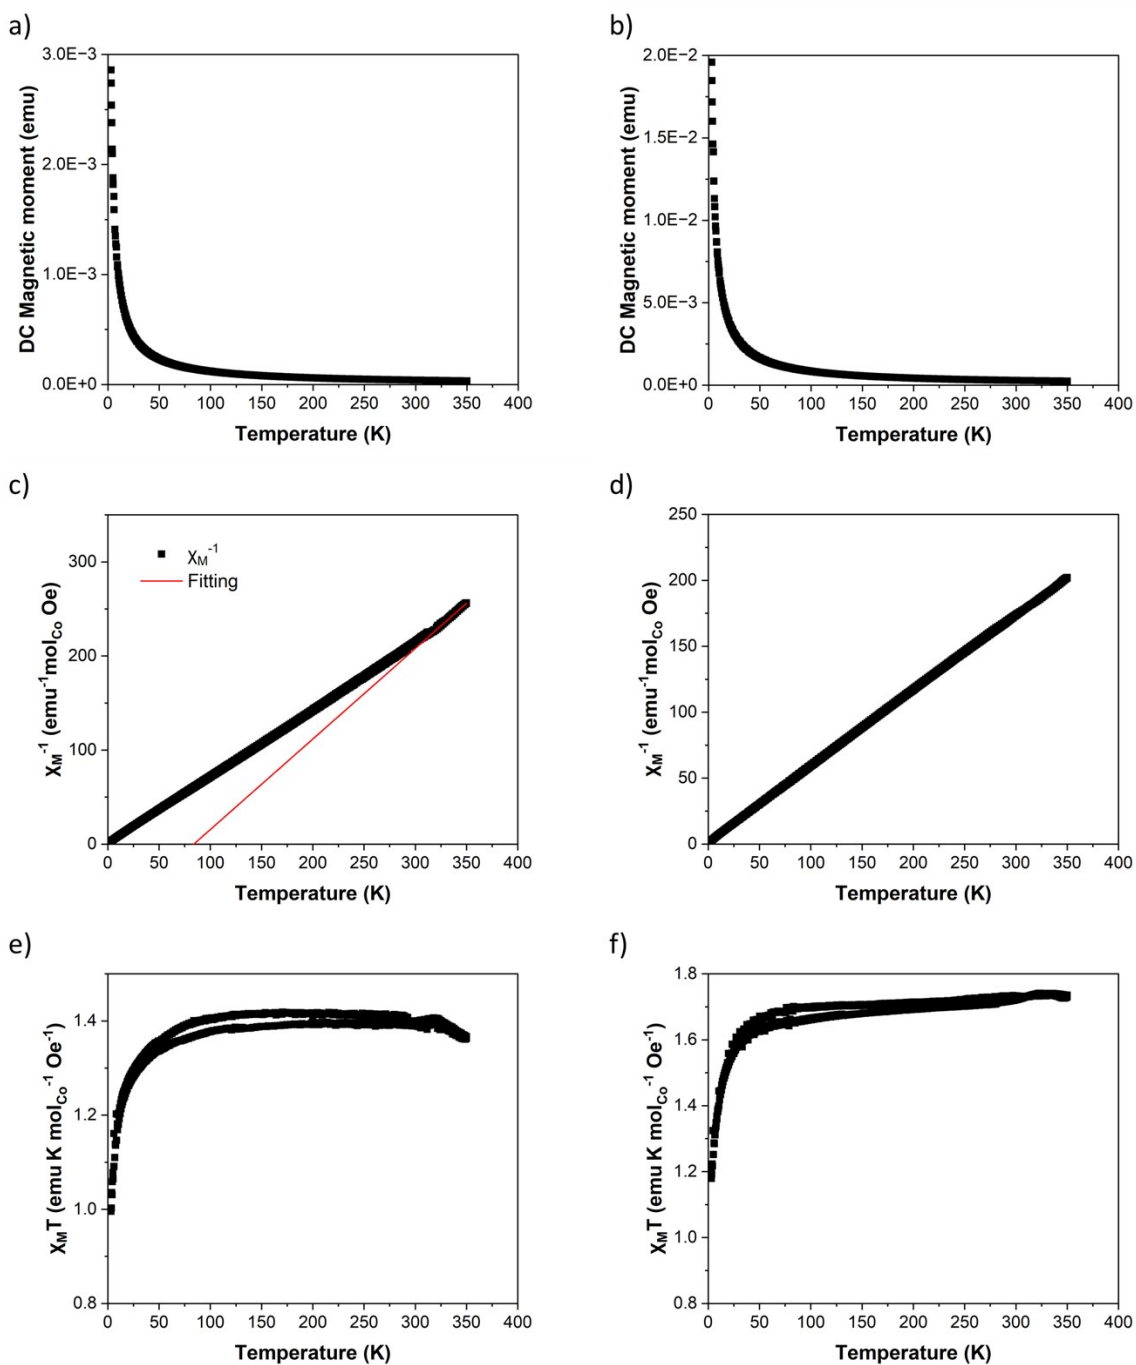

Figure S11. Magnetic characterisation of mDESYS-1 and mDESYS-2 measured at 2 T in the 3 – 350 K temperature range. Temperature dependence of DC magnetic moment for a) mDESYS-1 and b) mDESYS-2. Inverse molar magnetic susceptibility ( $\chi_M^{-1}$ ) vs temperature, including linear extrapolation to the zero level of a possible ferromagnetic ordering, for c) mDESYS-1 and d) mDESYS-2. The  $\chi_M^{-1}T$  vs temperature plot for e) mDESYS-1 and f) mDESYS-2.

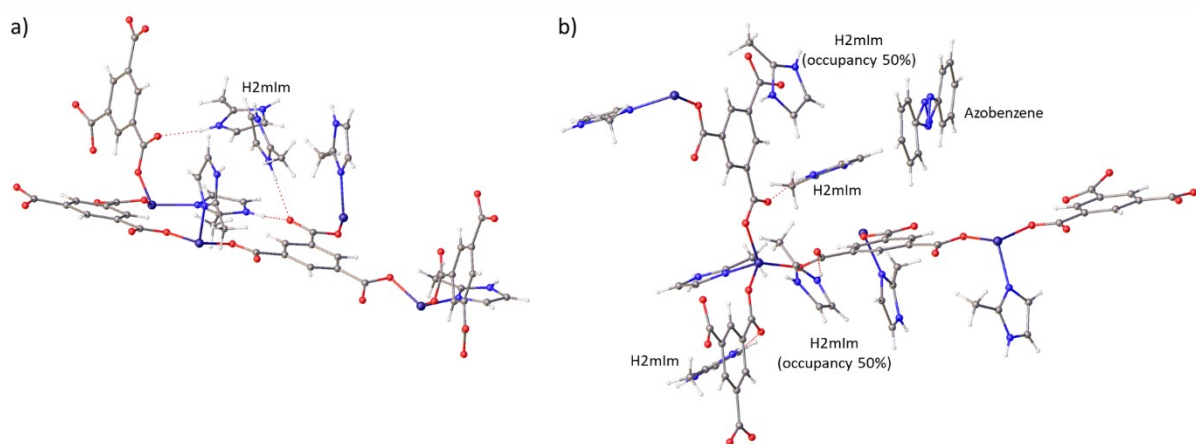

Figure S12. Asymmetric unit cell of a) mDESY-1 in P-1 space group and b) Azo@mDESY-1.

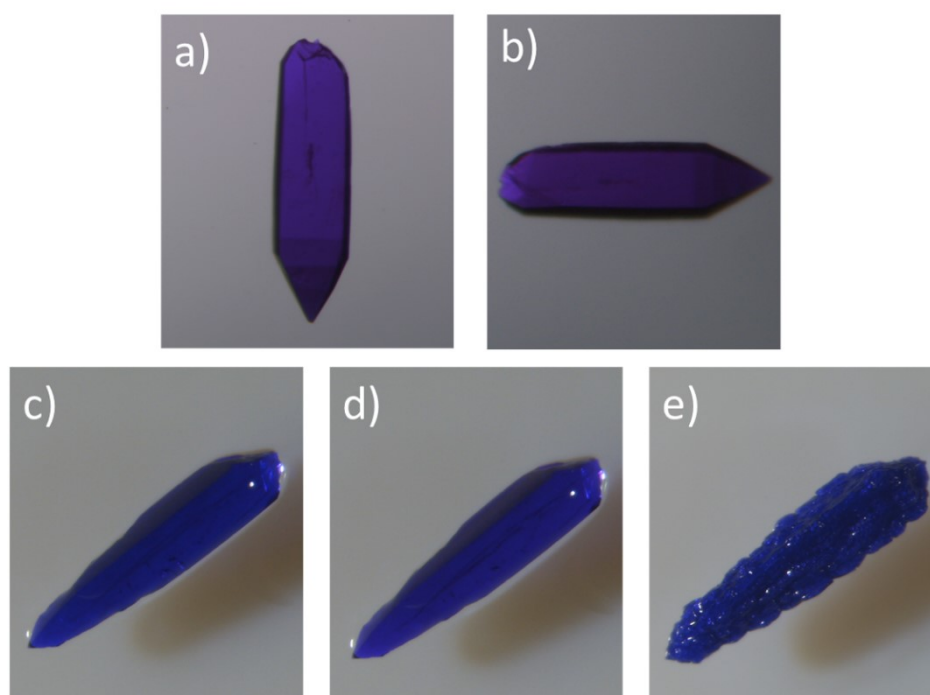

Figure S13. a) and b) Optical images of mDESY-1 at two different orientations, using transmission mode. Optical images of mDESY-1 at c) room temperature (17 °C) and 130 °C after d) 30 seconds and e) >1 min.

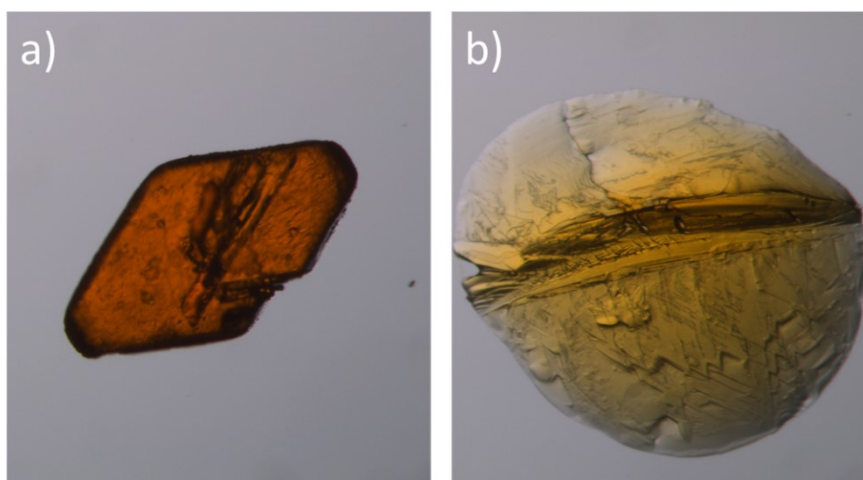

Figure S14. Optical images of azobenzene at a) room temperature (17 °C) and b) 68 °C.

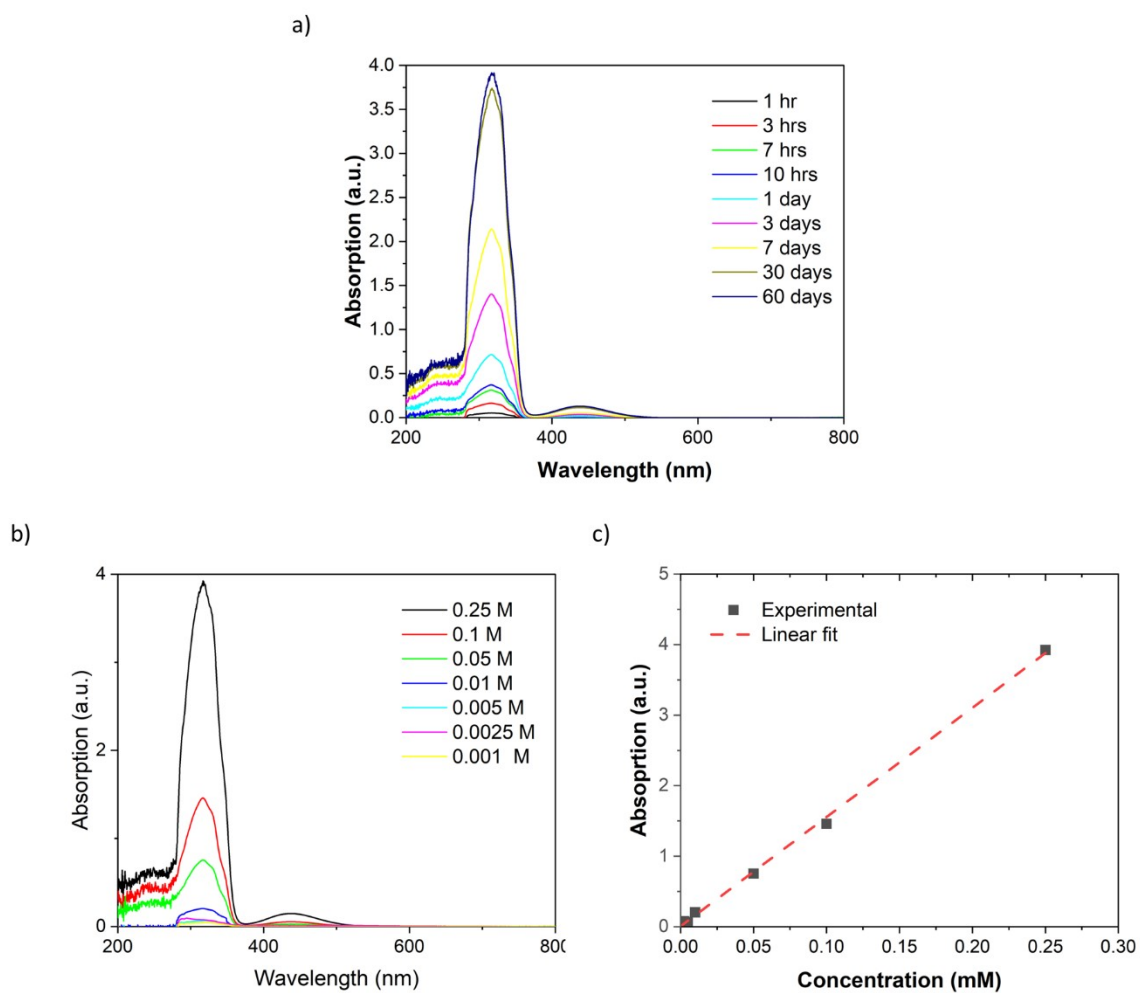

Figure S15. b) UV-vis spectra of the release of azobenzene in ethanol from mDESY-1 in a 2 month period, b) UV-vis spectra of azobenzene solution at different concentration used for the calibration curve and c) calibration curve used to calculate the concentration of released azobenzene.

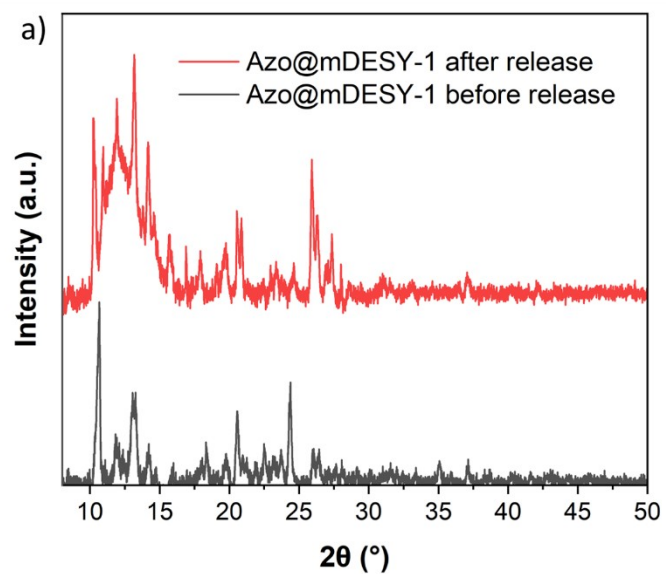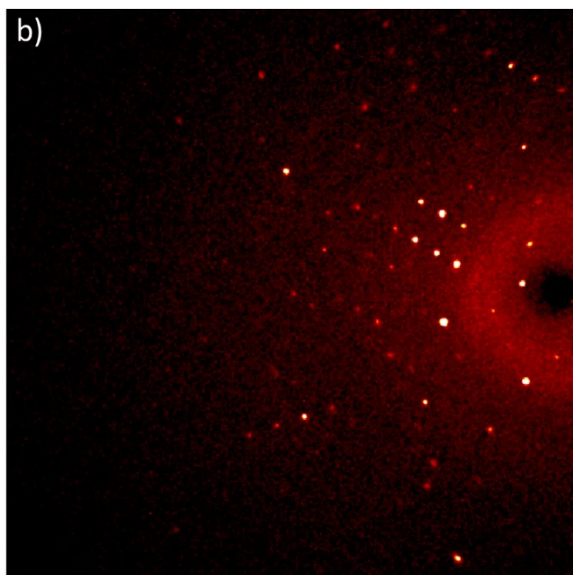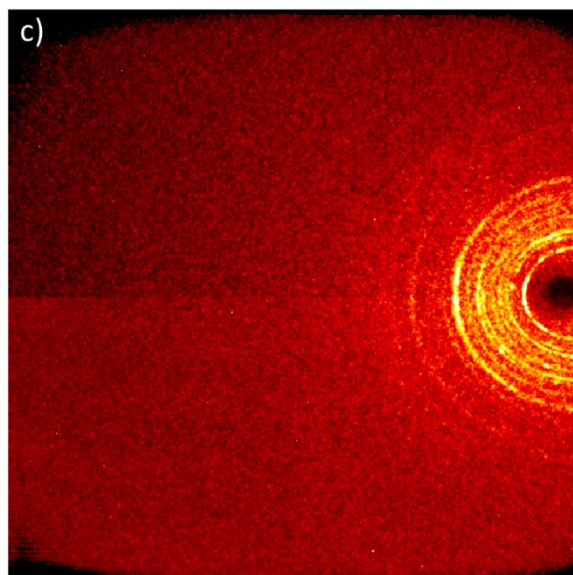

Figure S16. a) PXR D pattern of Azo@mDES Y-1 before and after the release of azobenzene. Diffraction images of a single crystal of Azo@mDES Y-1 b) before and c) after release of azobenzene.



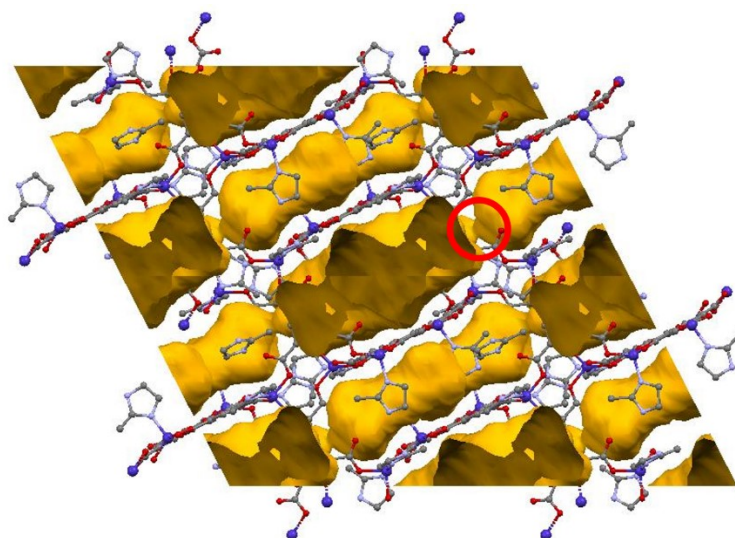

Figure S17. Calculated voids in Azo@mDESY-1, with Azobenzene molecules omitted during the calculation. The red circle highlights a constricted region within the channel.
