# Supplementary figures and images for: Neutral and ionic Co(ii) metal–organic frameworks with 2-methylimidazole and trimesate: design and evaluation for molecule encapsulation and slow release
Source: Royal Society of Chemistry journal article supplement (doi:10.1039/d4dt02679a), 2025-01-01

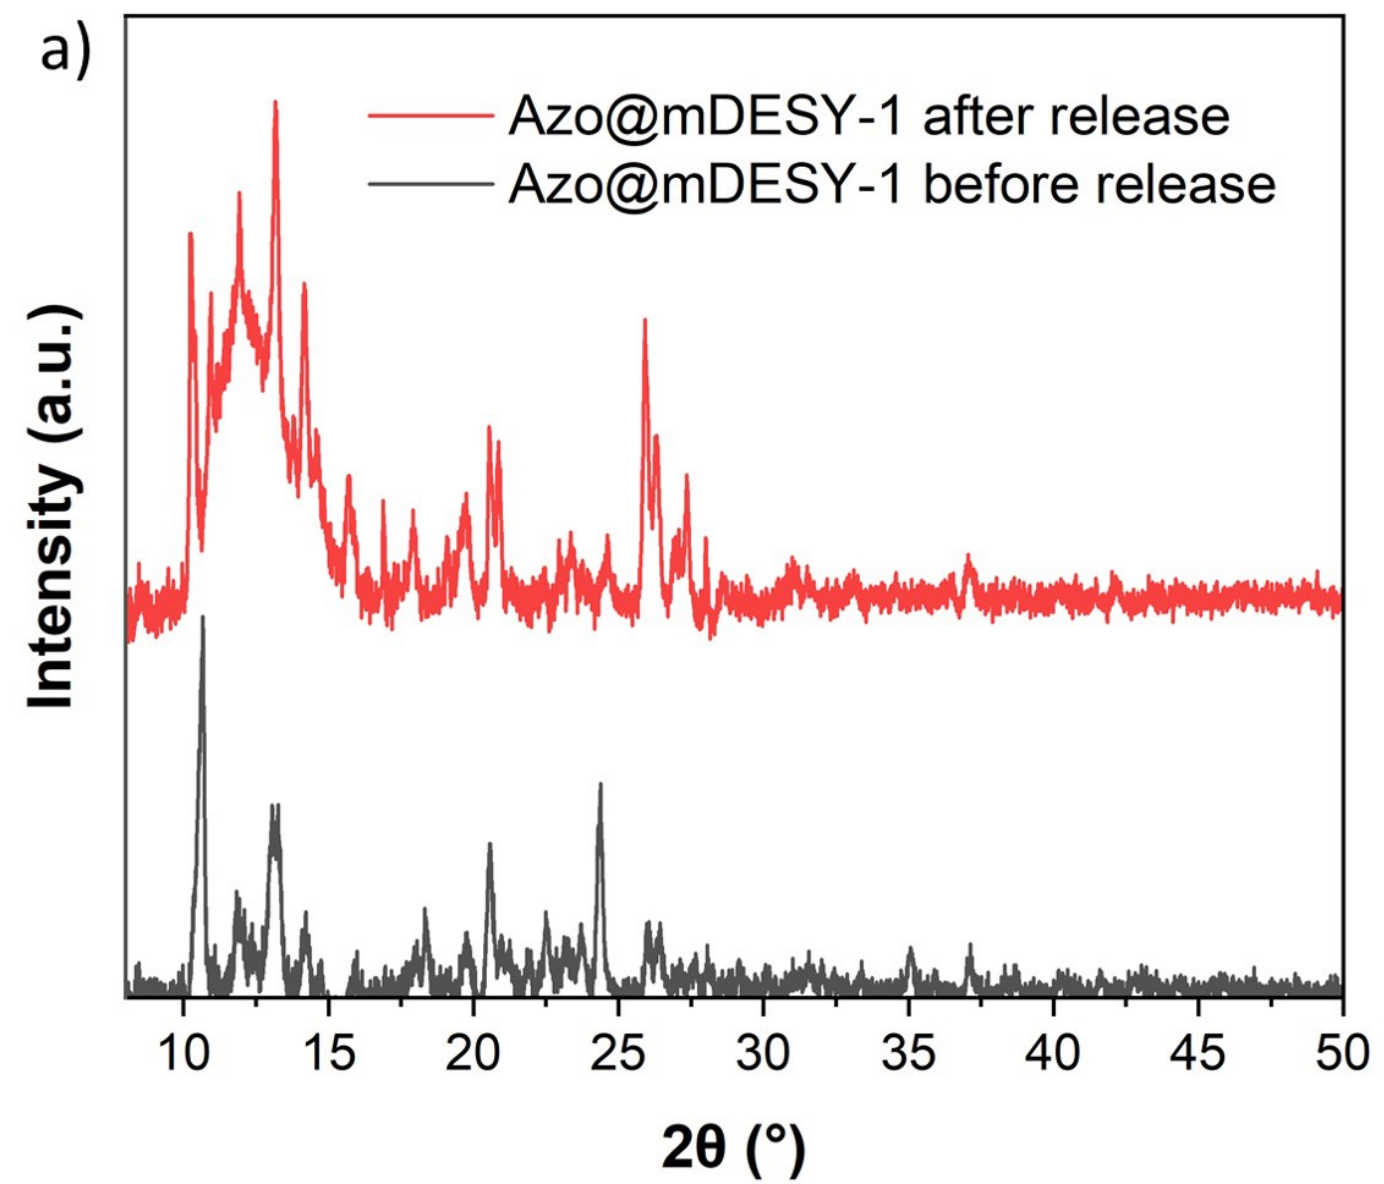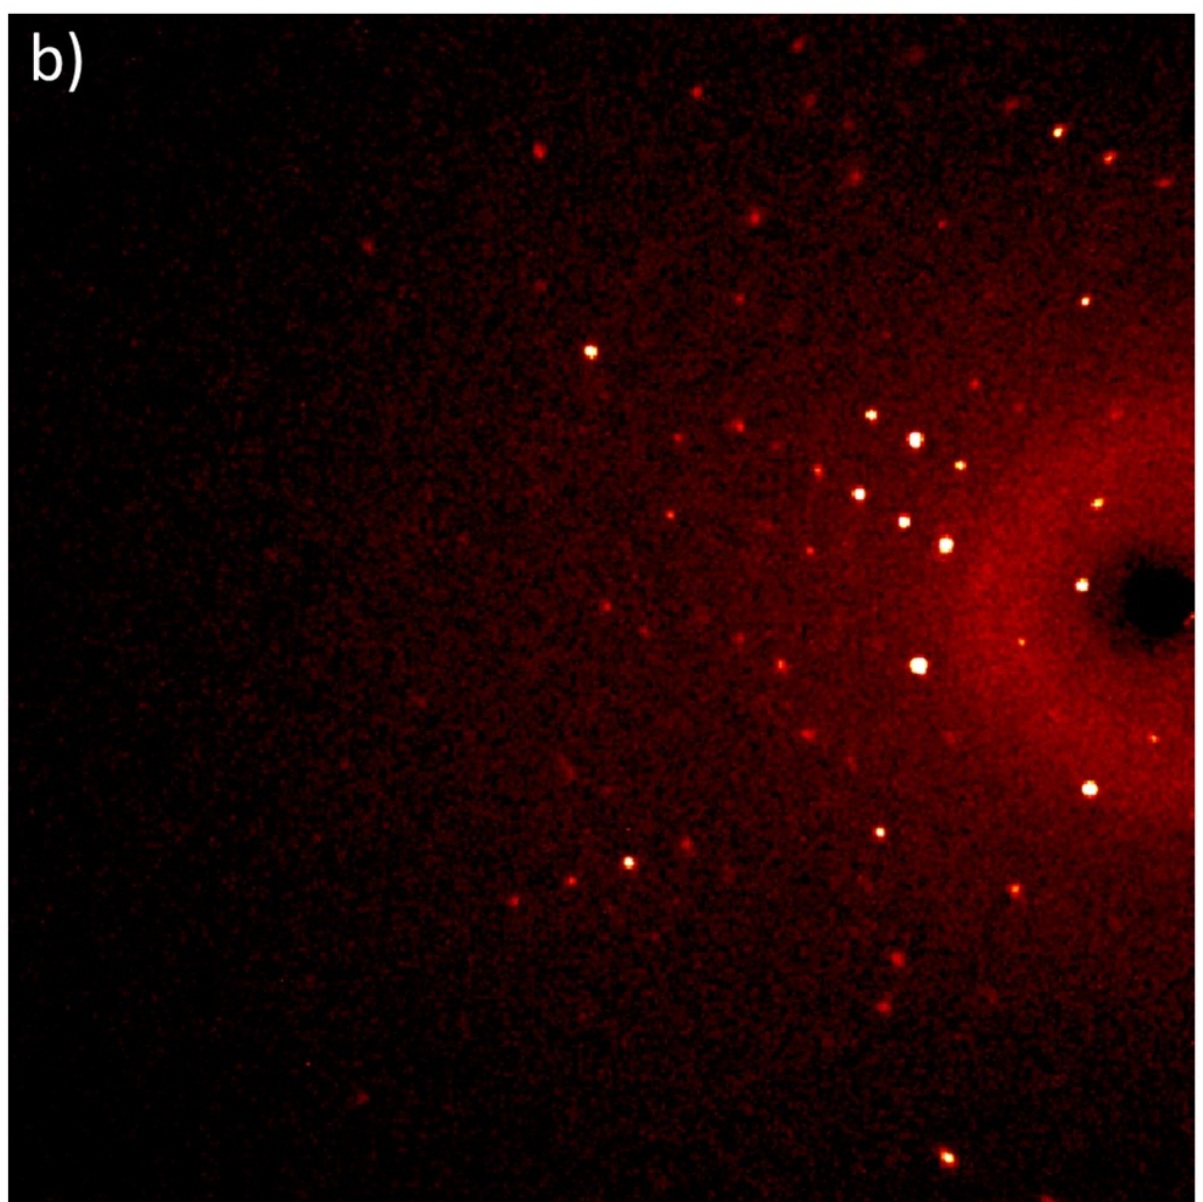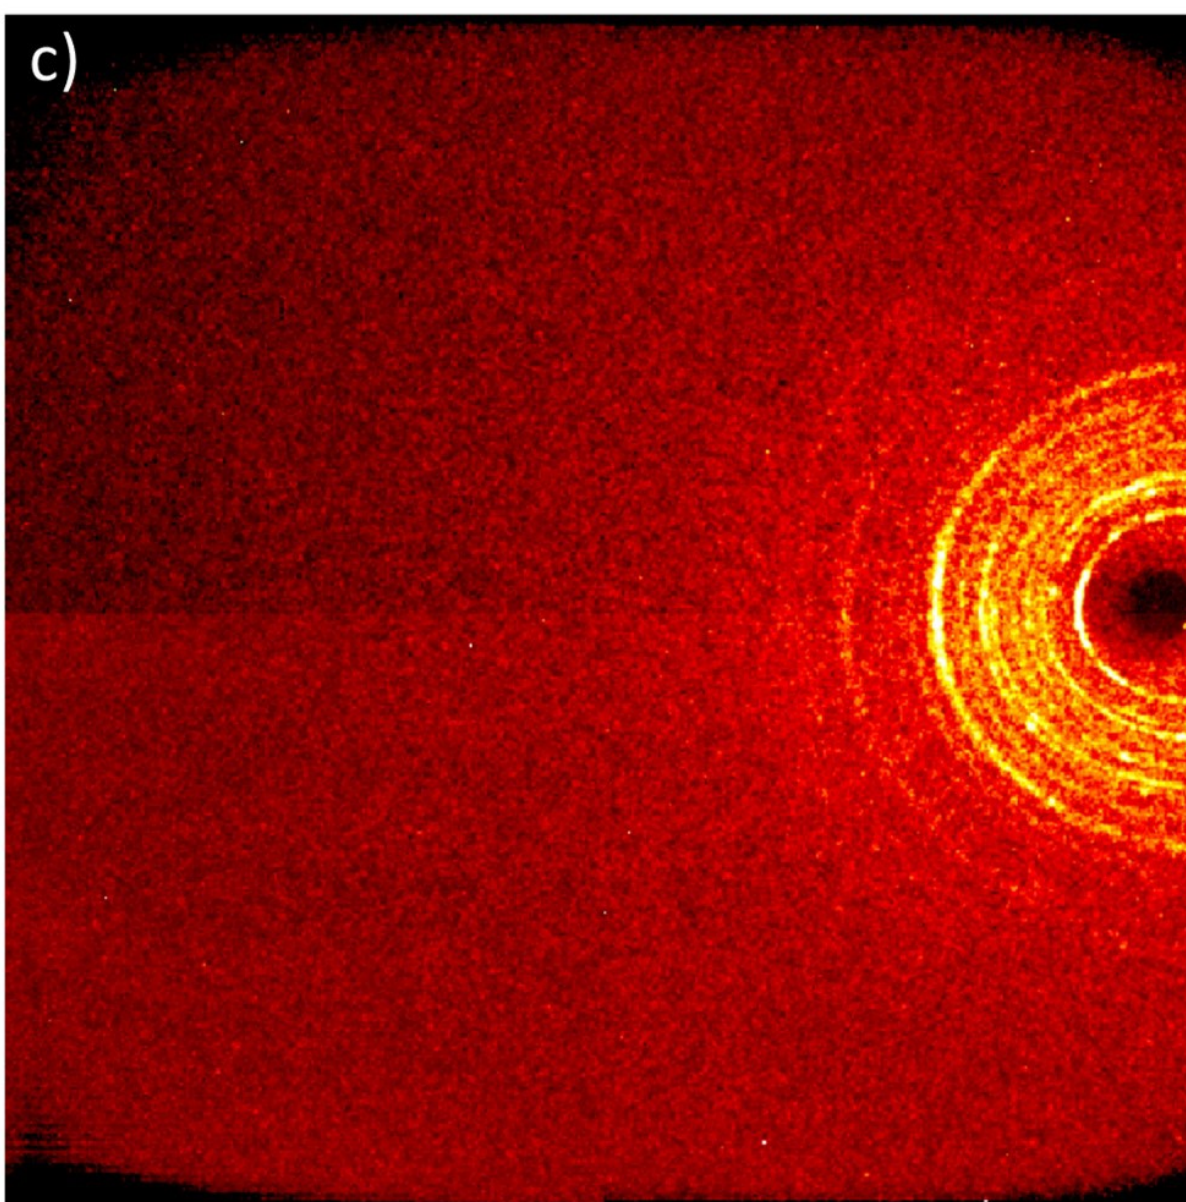

Supplement: d4dt02679a10.pdf [file d4dt02679a10.pdf]

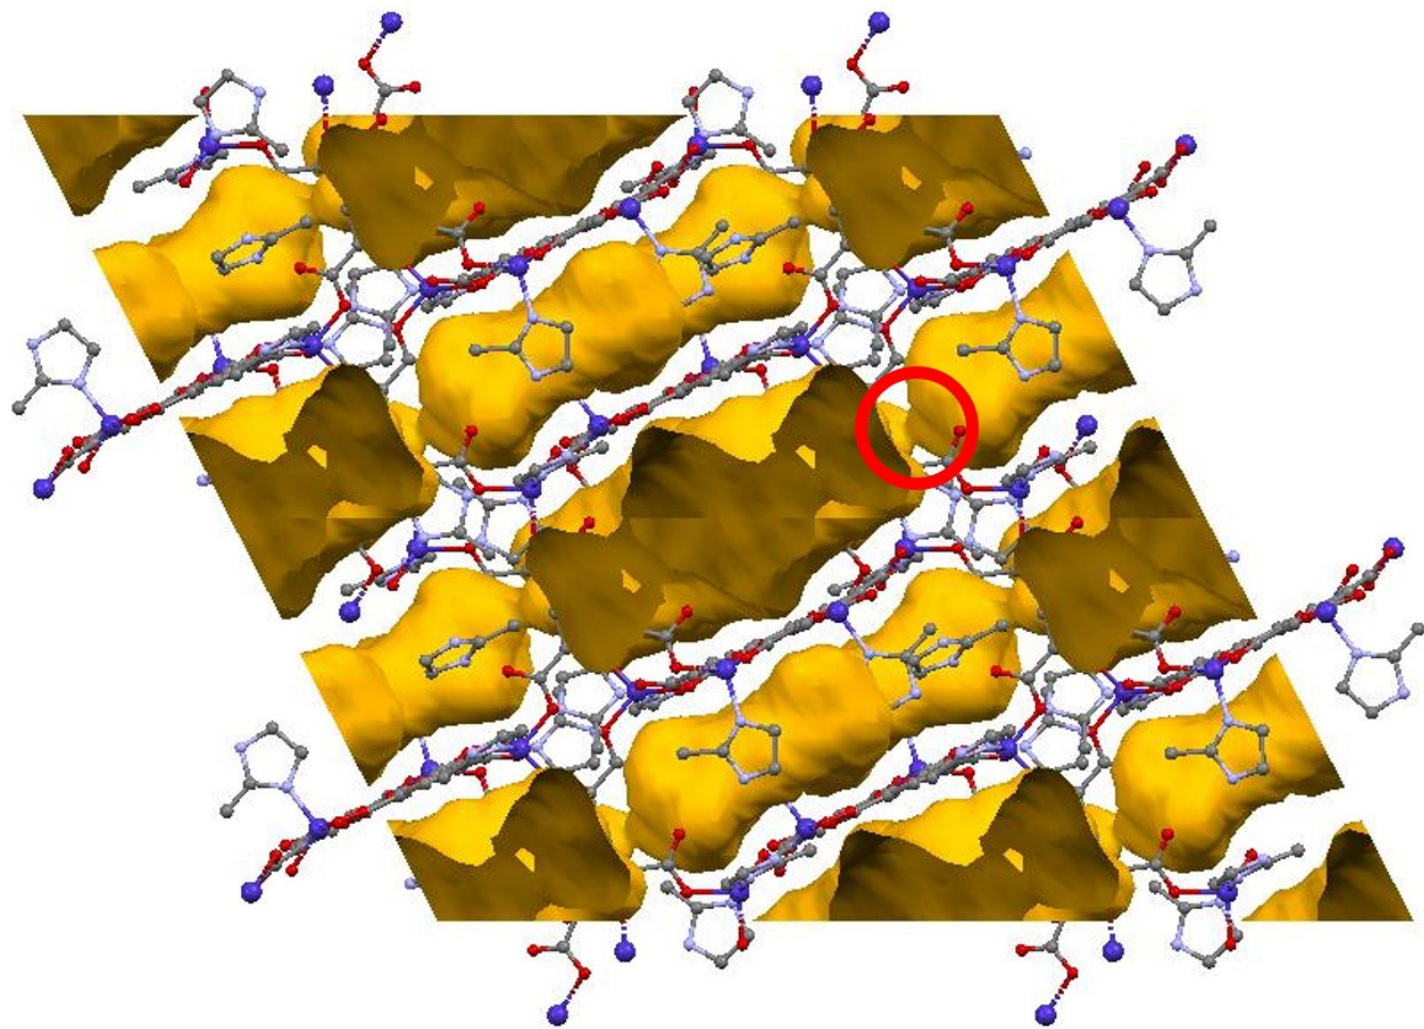

Supplement: d4dt02679a11.pdf [file d4dt02679a11.pdf]

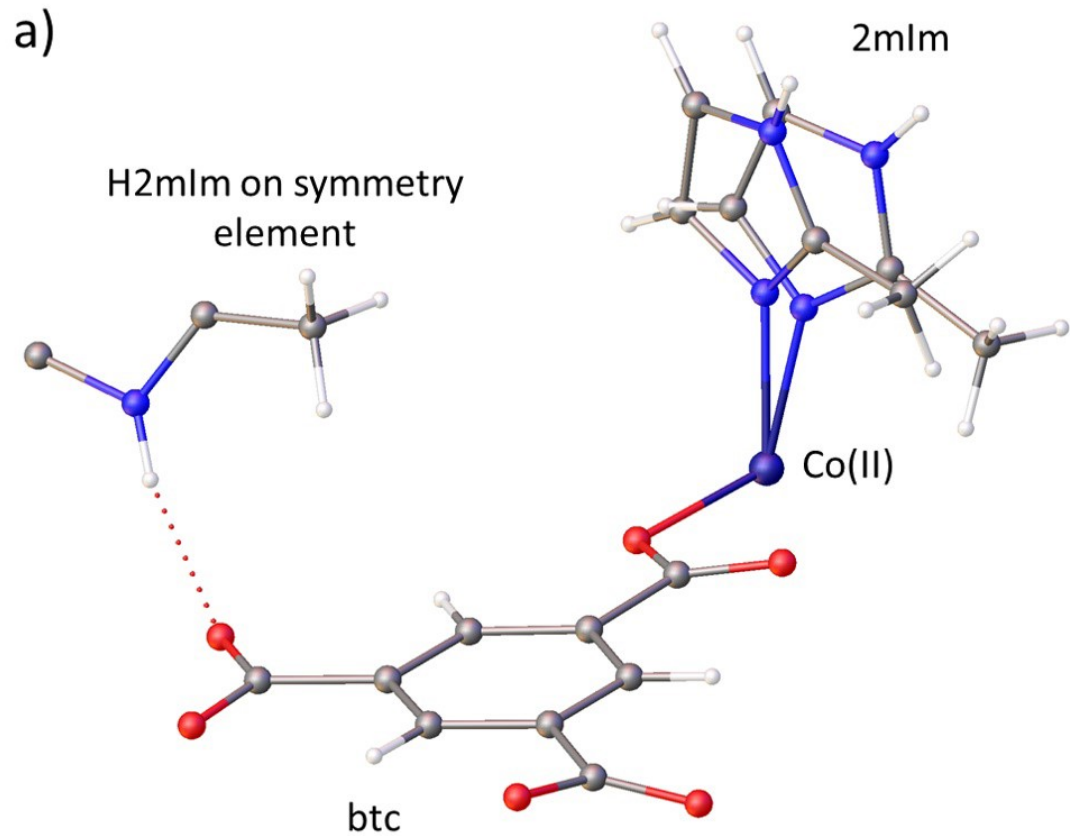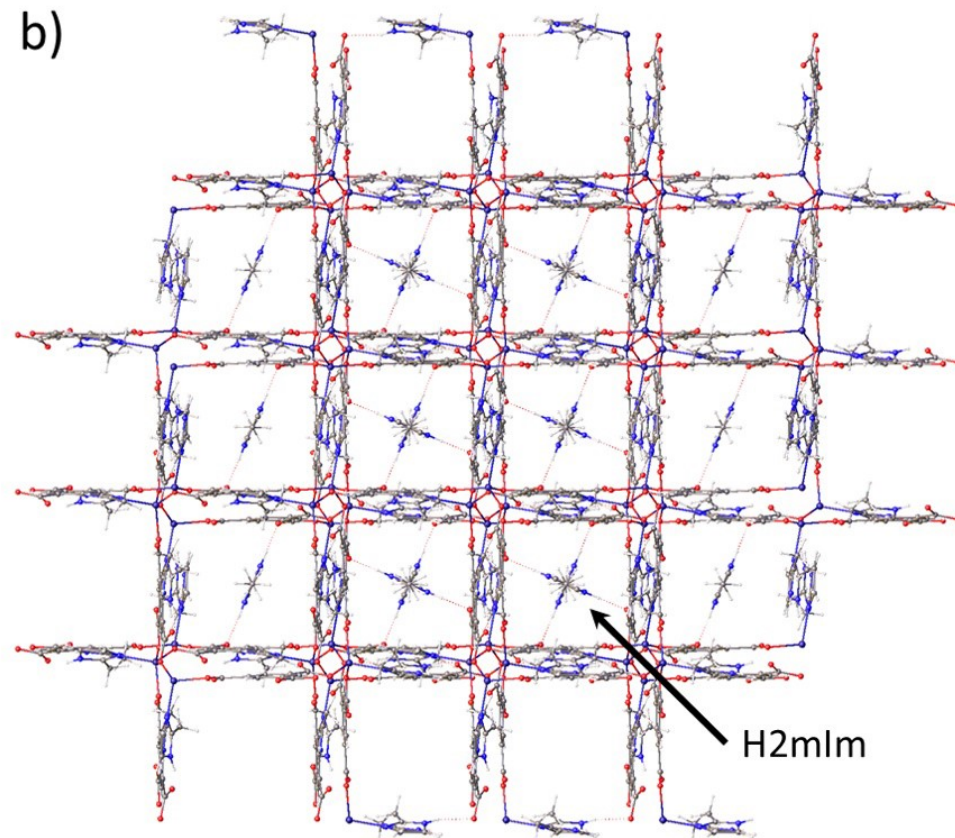

Supplement: d4dt02679a12.pdf [file d4dt02679a12.pdf]

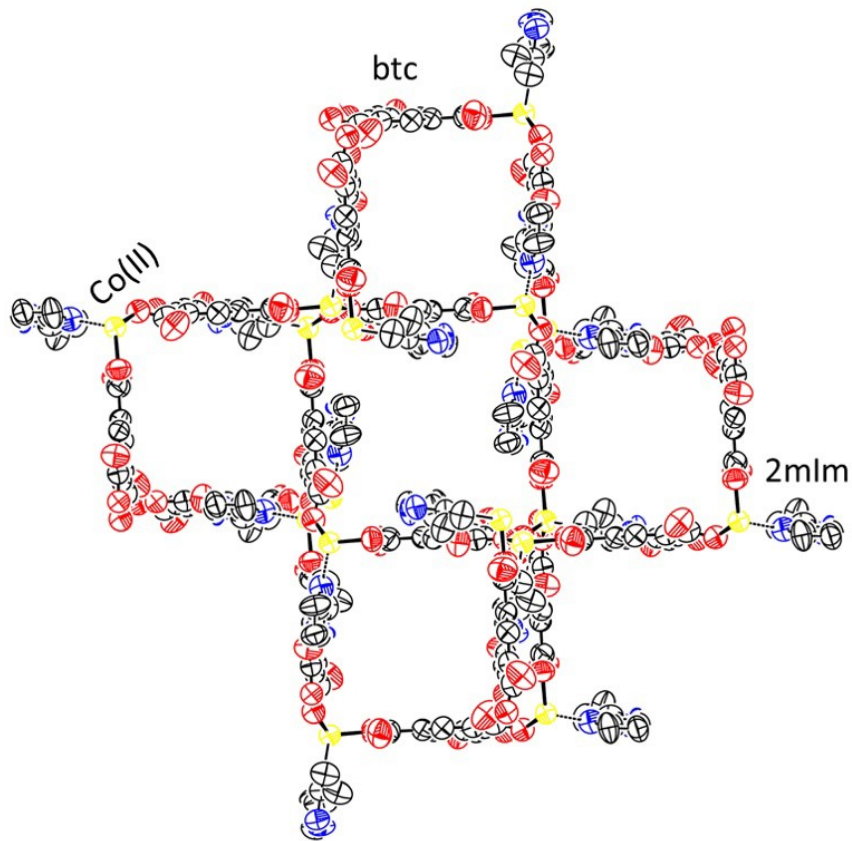

Supplement: d4dt02679a13.pdf [file d4dt02679a13.pdf]

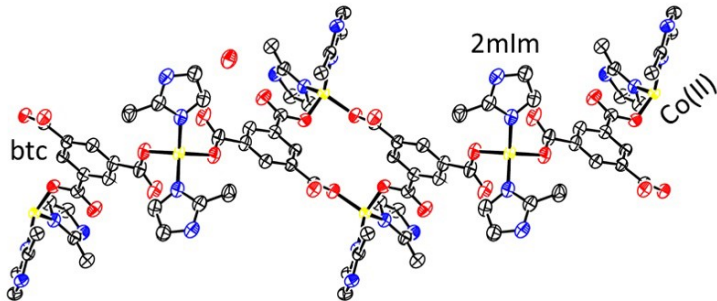

Supplement: d4dt02679a14.pdf [file d4dt02679a14.pdf]

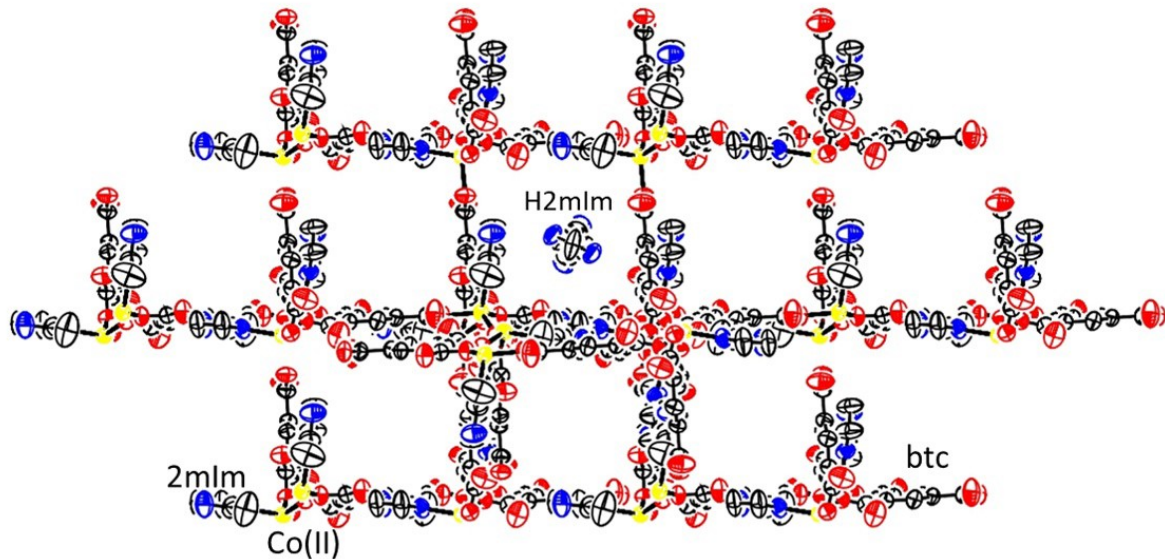

Supplement: d4dt02679a15.pdf [file d4dt02679a15.pdf]

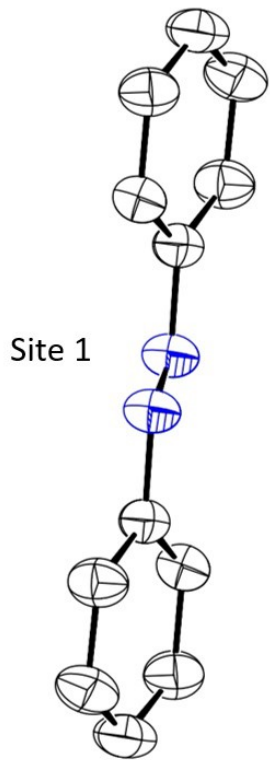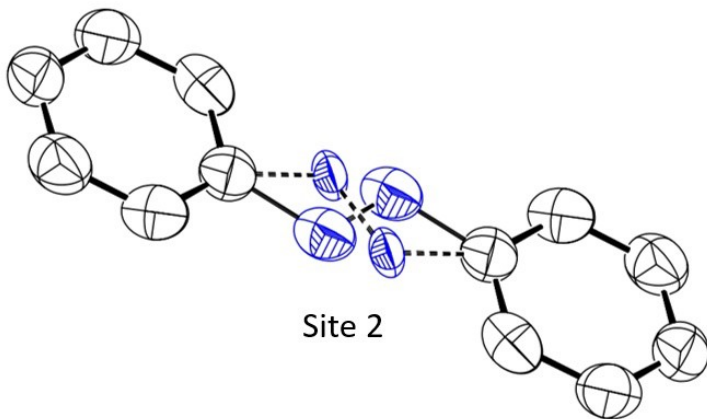

Supplement: d4dt02679a16.pdf [file d4dt02679a16.pdf]

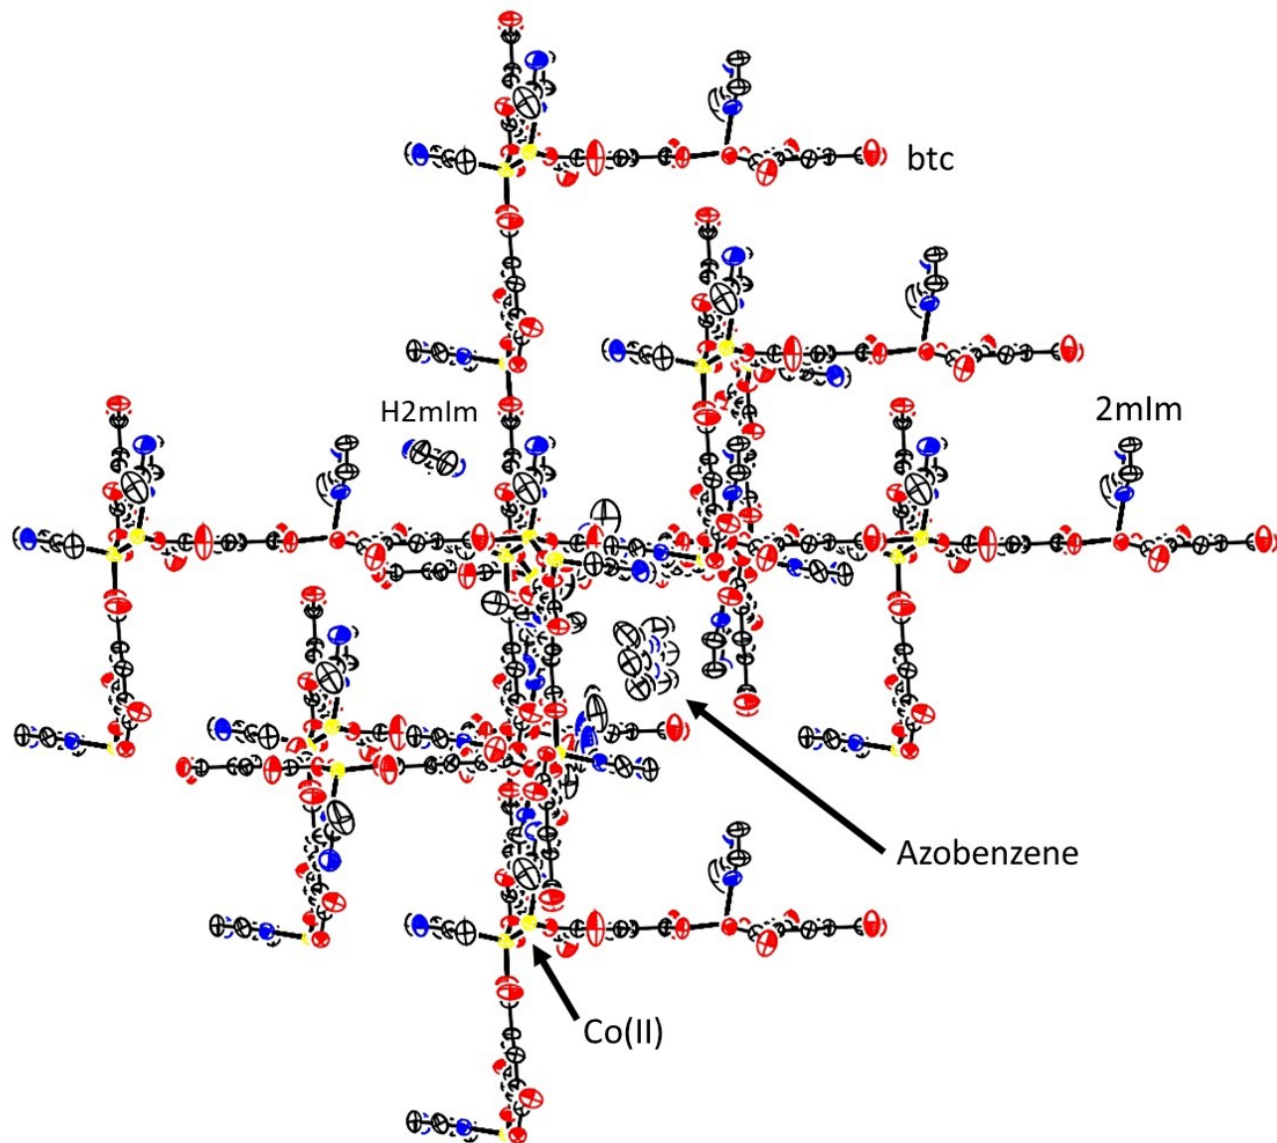

Supplement: d4dt02679a17.pdf [file d4dt02679a17.pdf]

a)

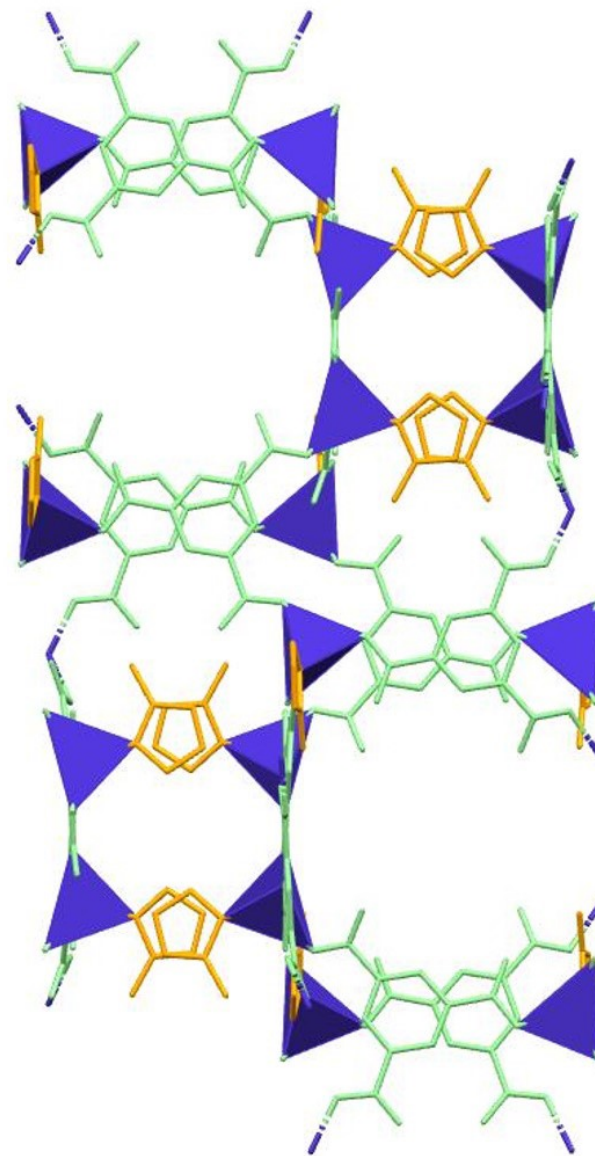

b)

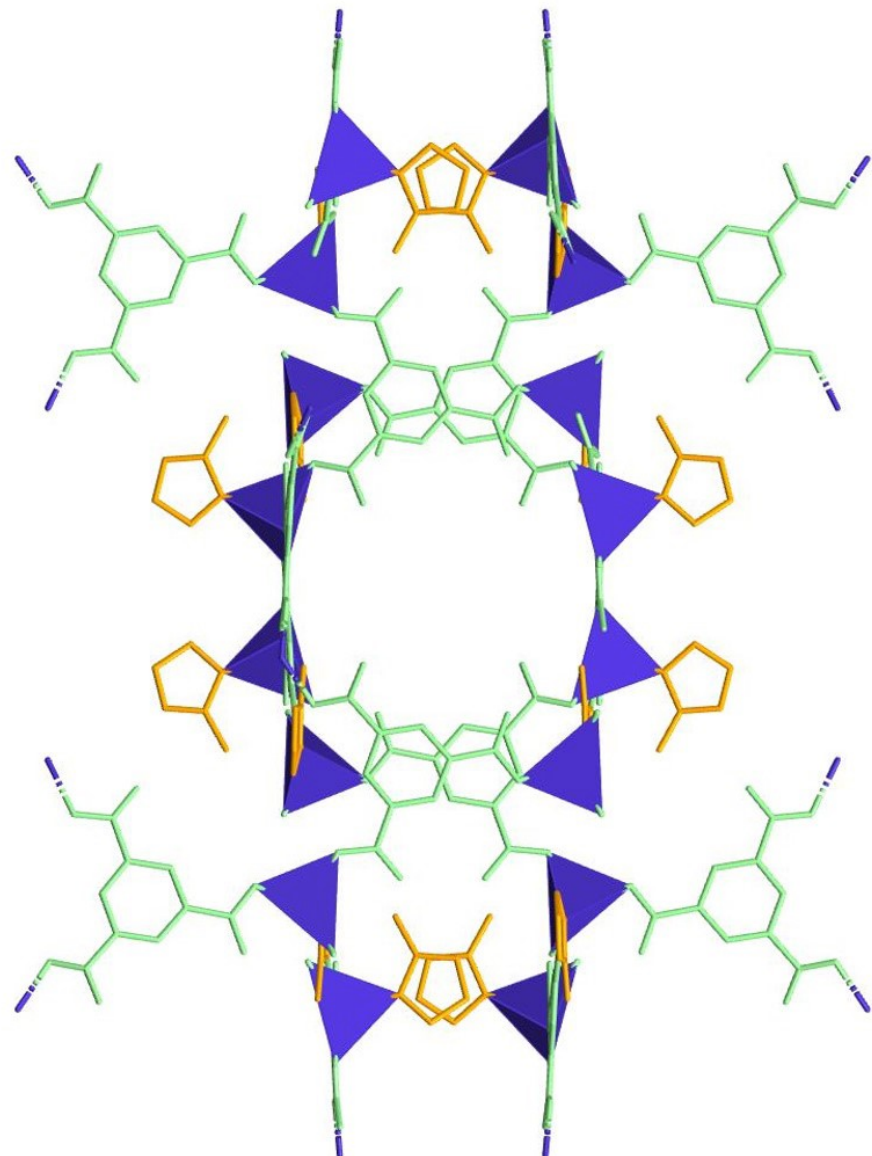

c)

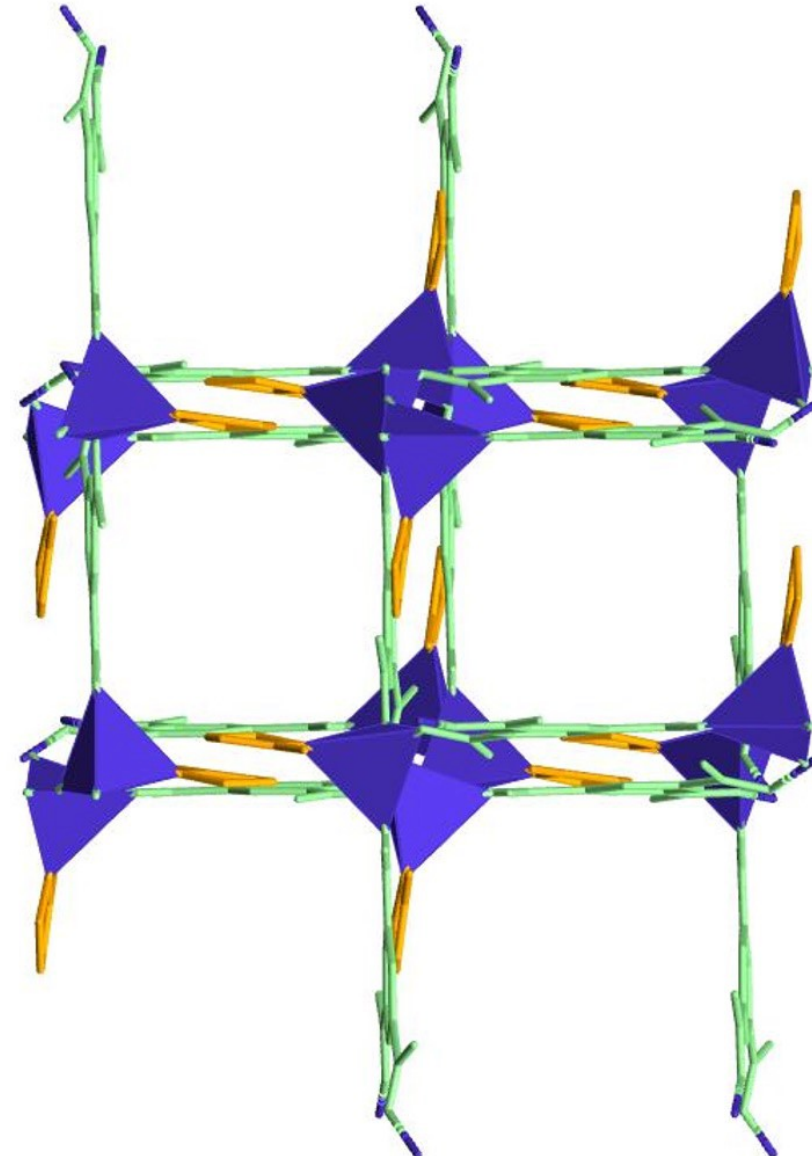

Supplement: d4dt02679a18.pdf [file d4dt02679a18.pdf]

a)

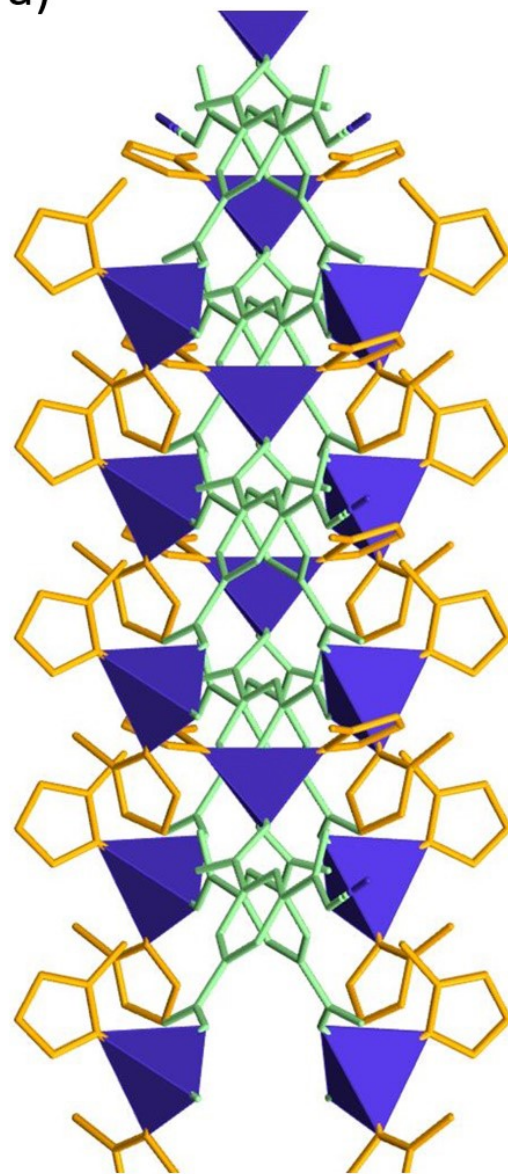

b)

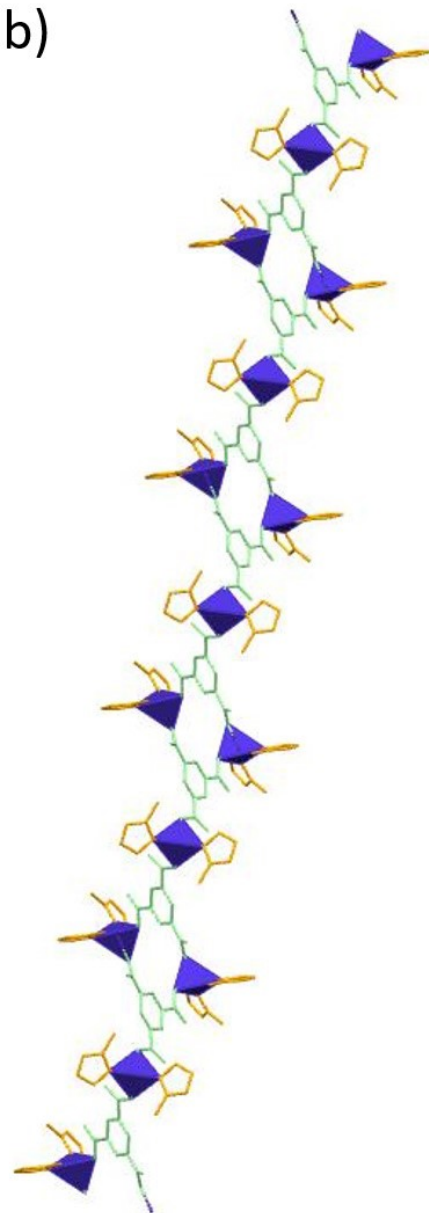

c)

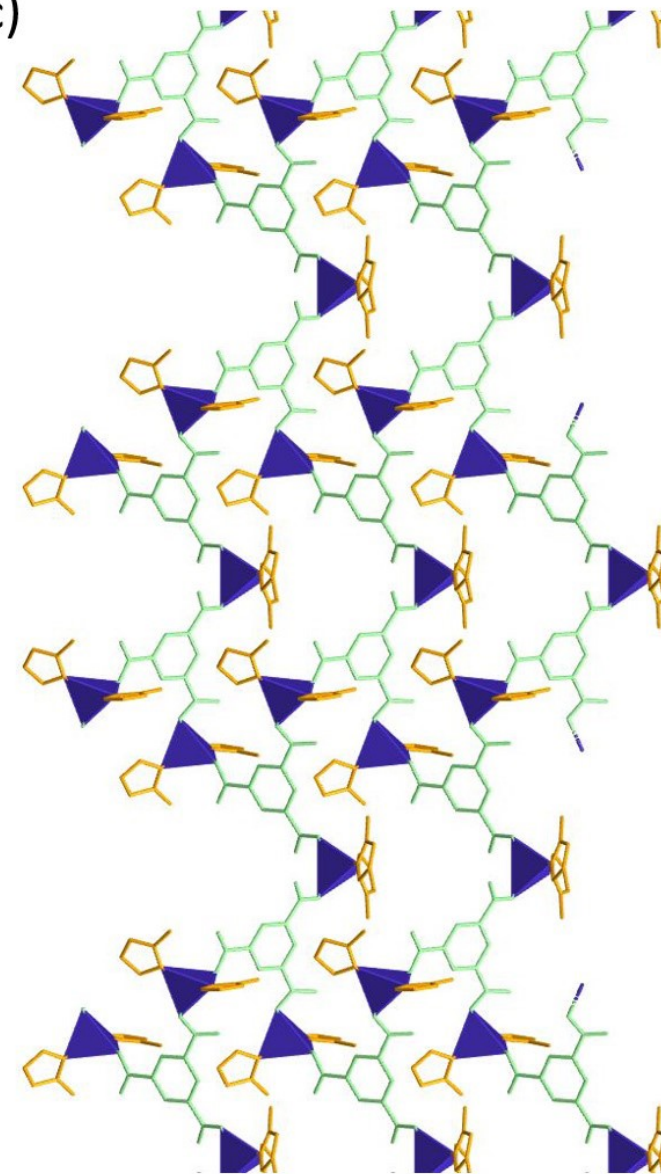

Supplement: d4dt02679a19.pdf [file d4dt02679a19.pdf]

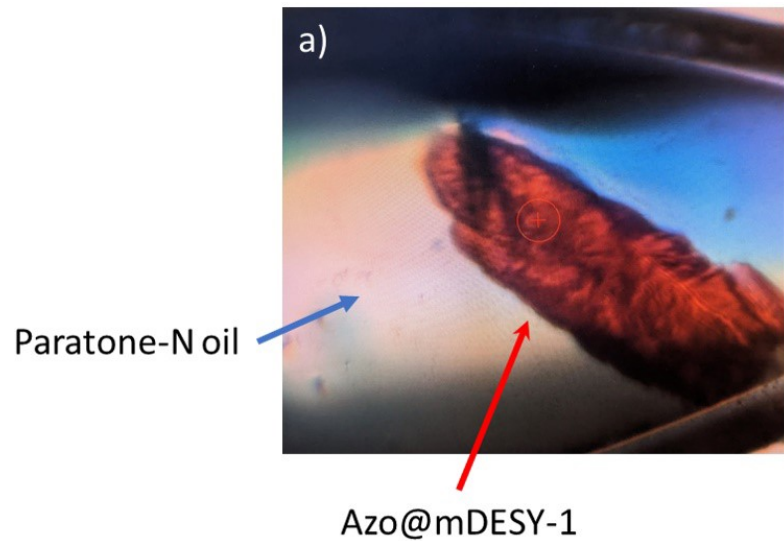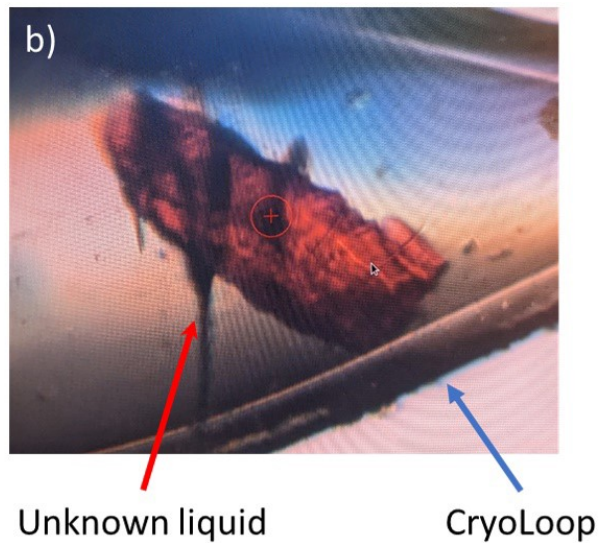

Supplement: d4dt02679a3.pdf [file d4dt02679a3.pdf]

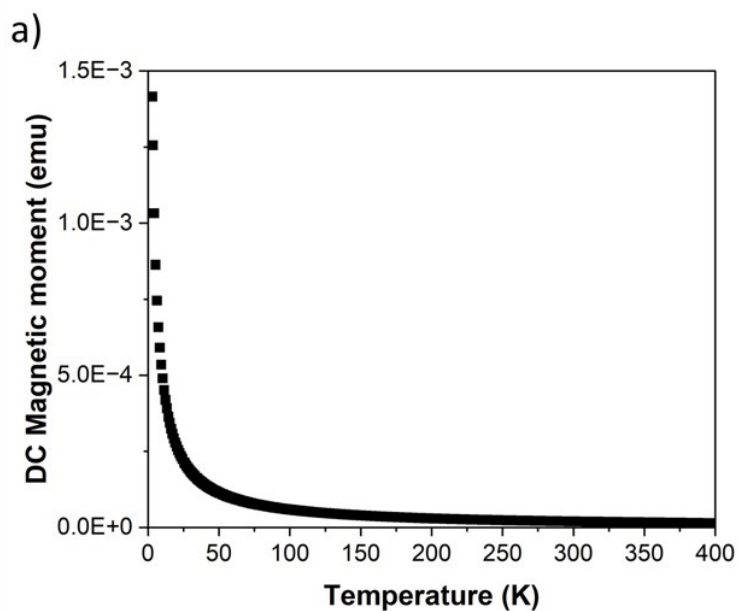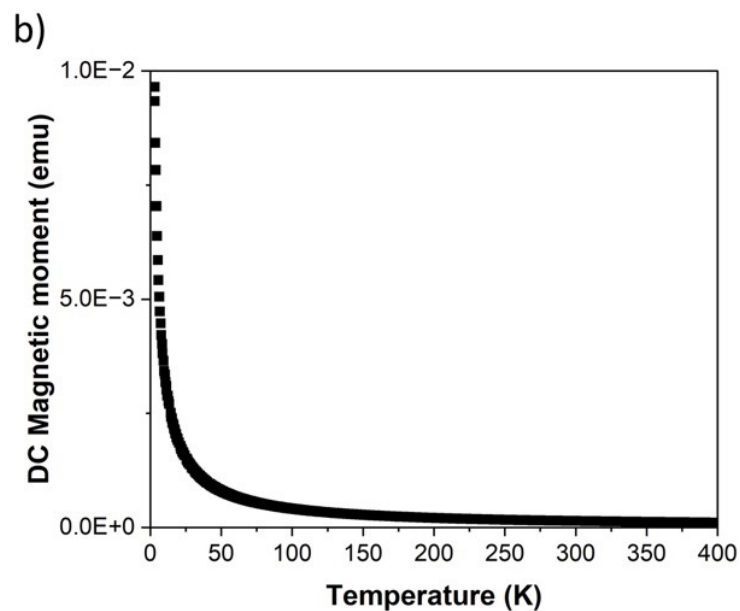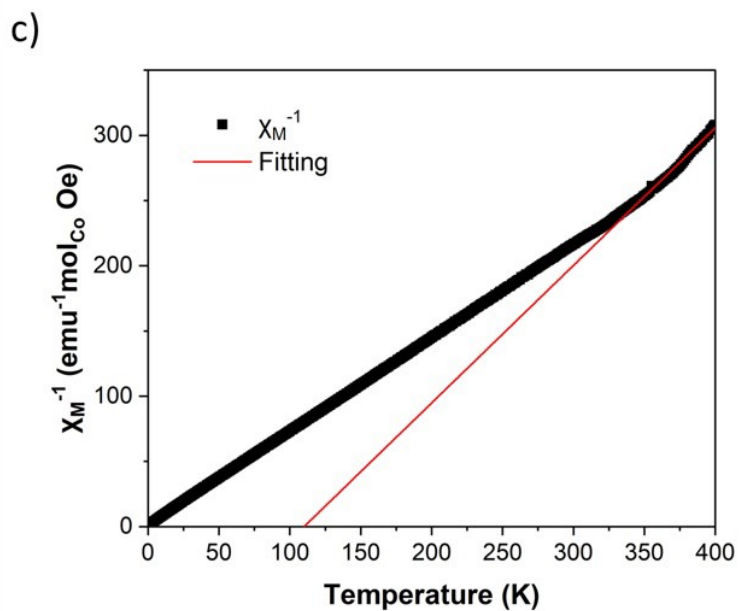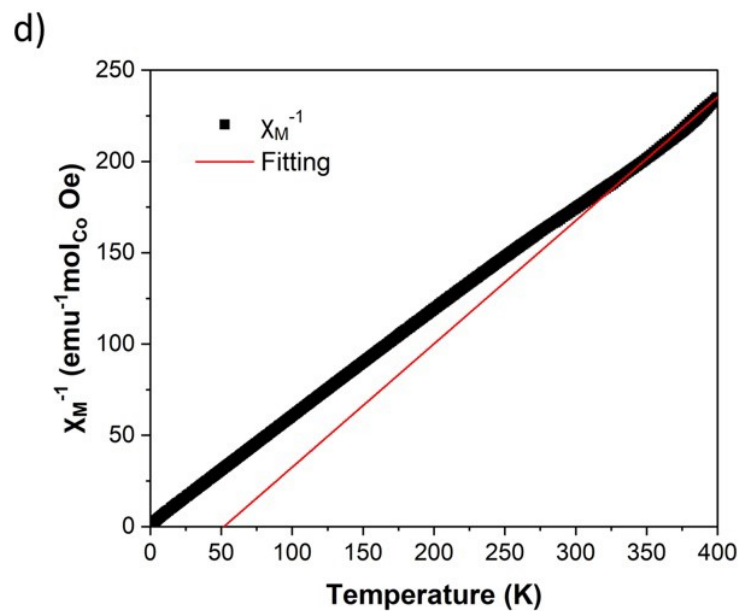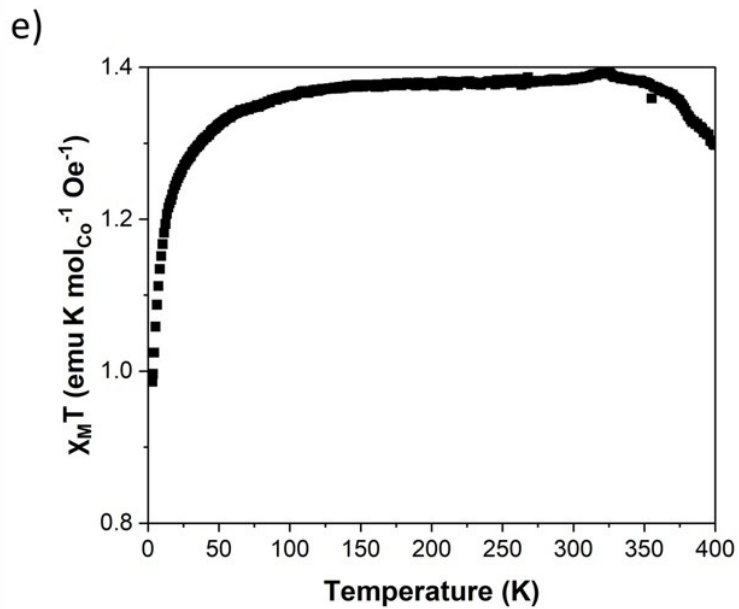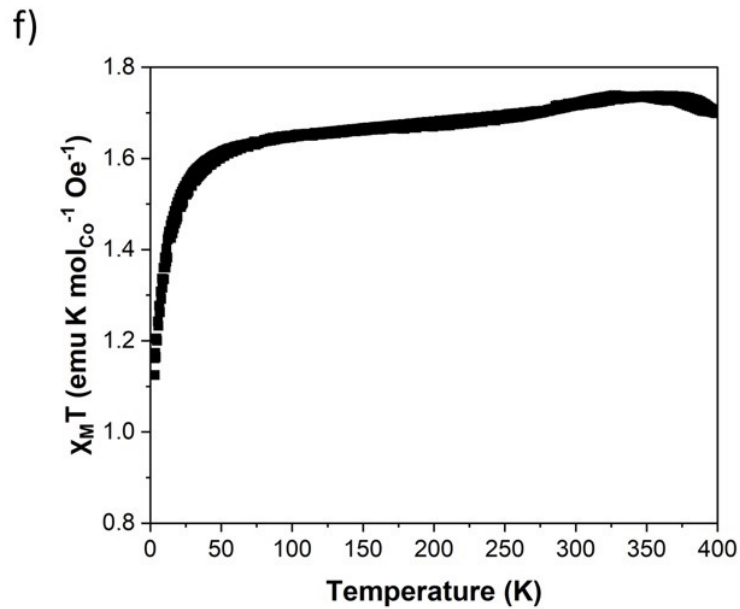

Supplement: d4dt02679a4.pdf [file d4dt02679a4.pdf]

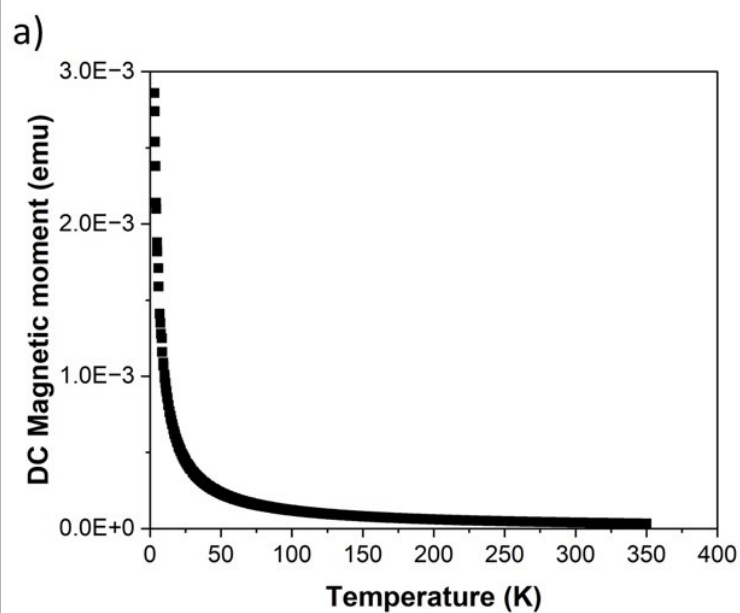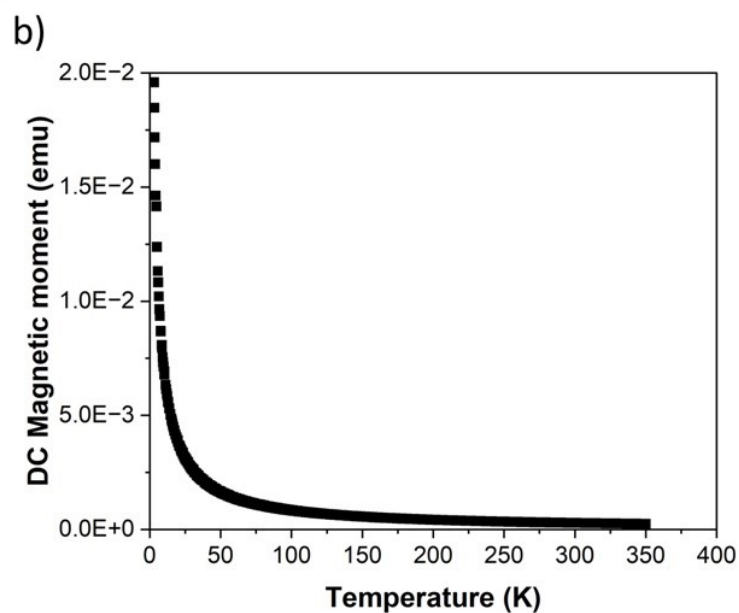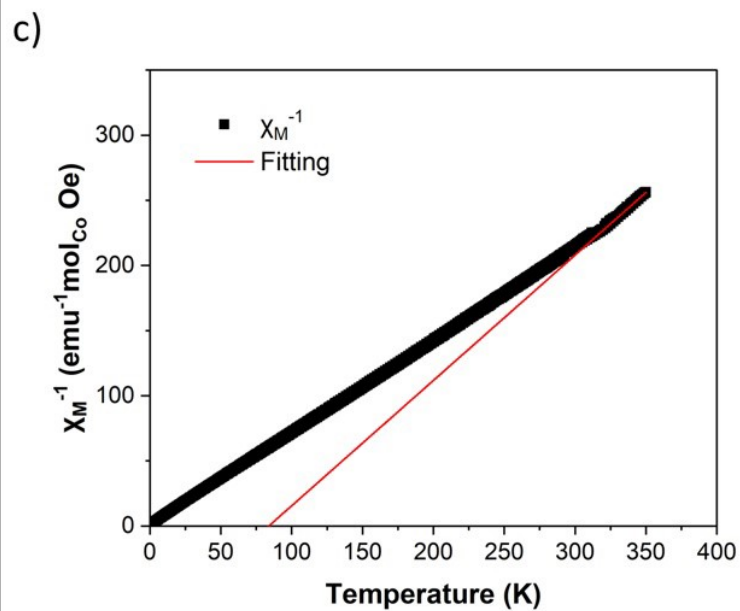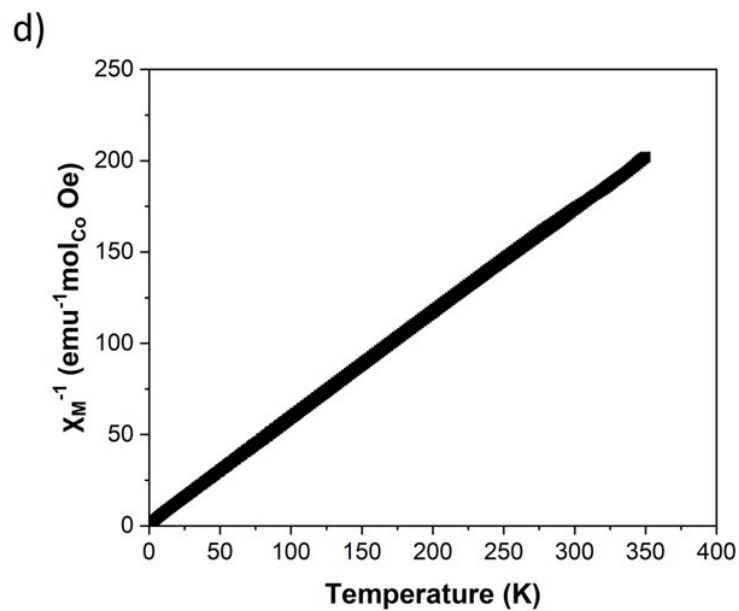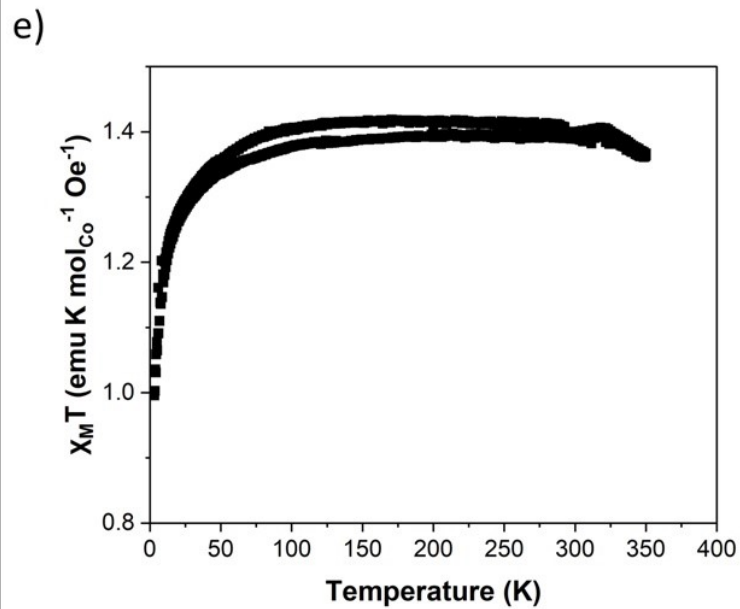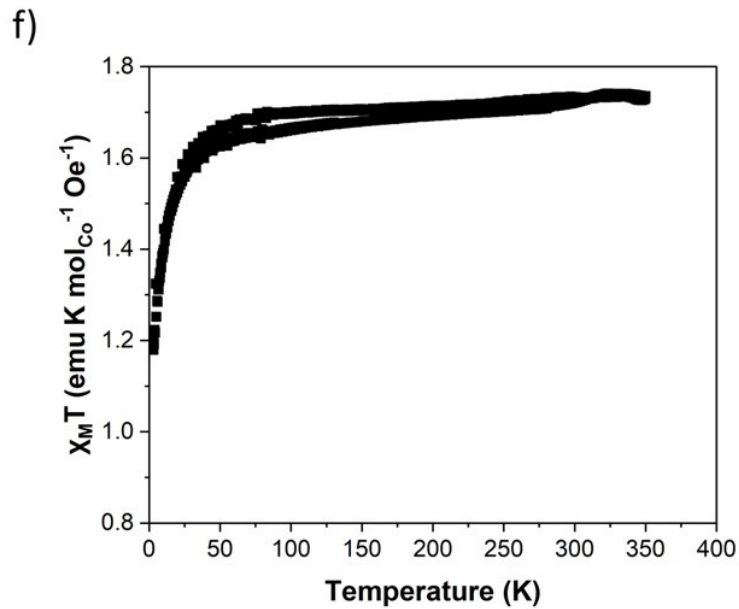

Supplement: d4dt02679a5.pdf [file d4dt02679a5.pdf]

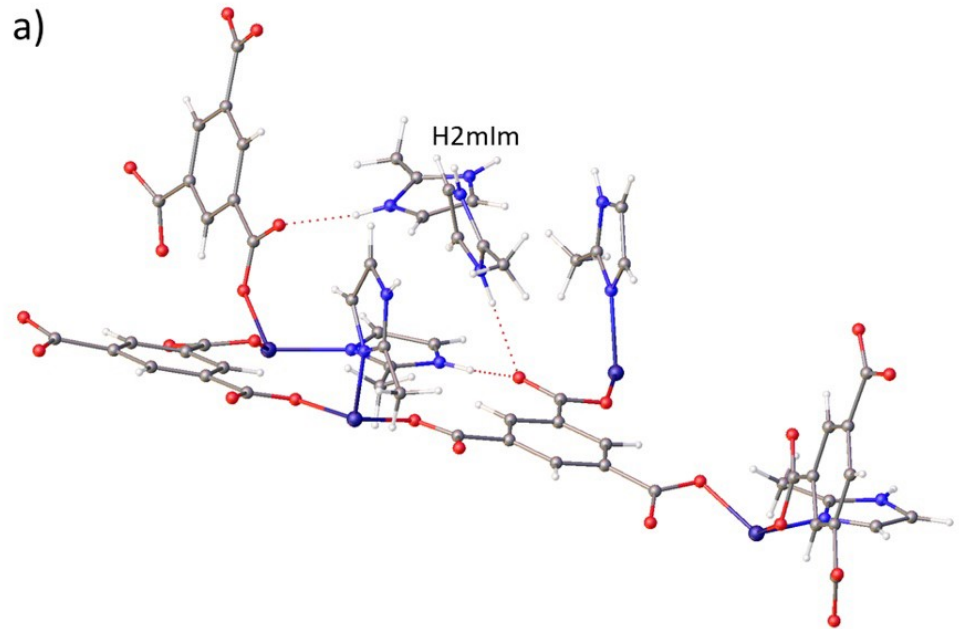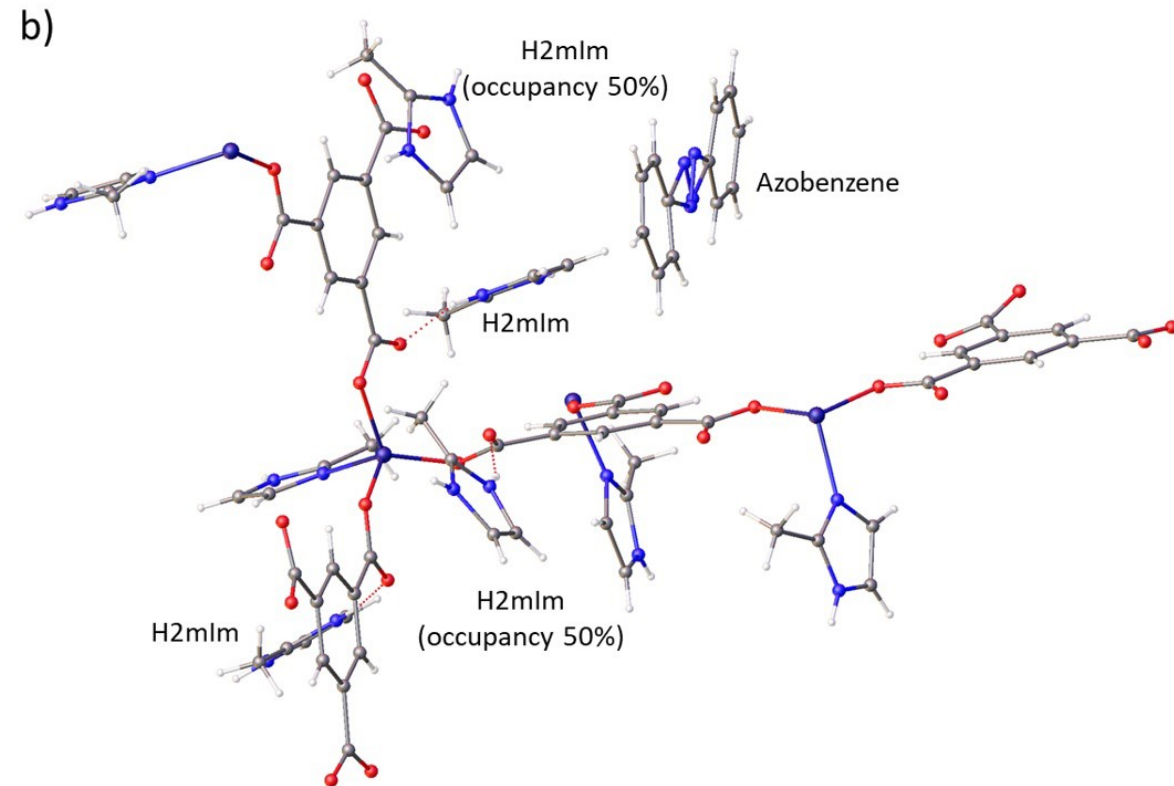

Supplement: d4dt02679a6.pdf [file d4dt02679a6.pdf]

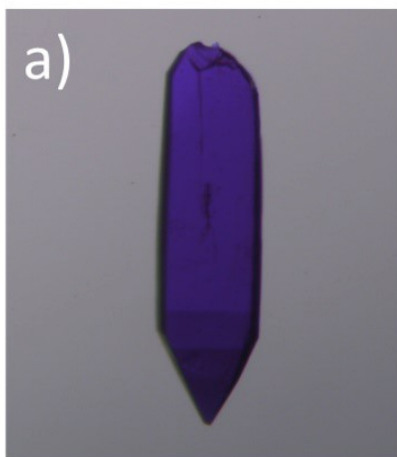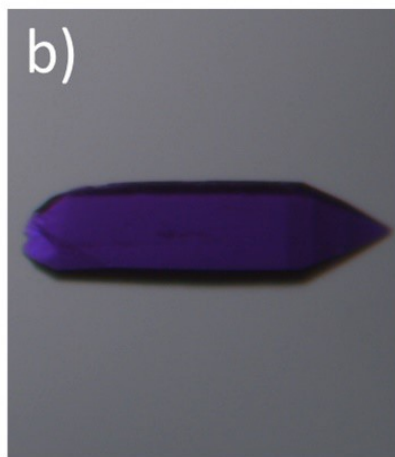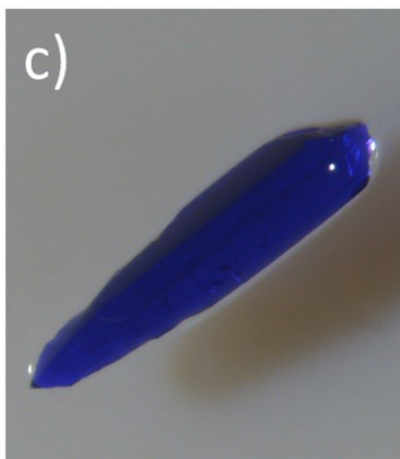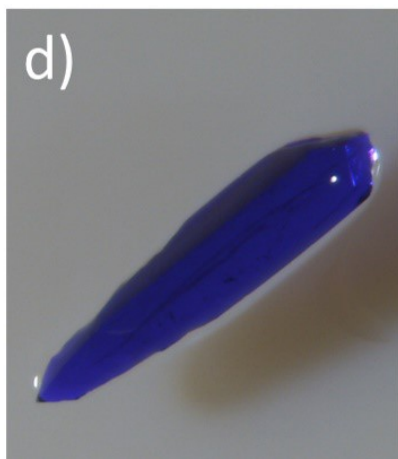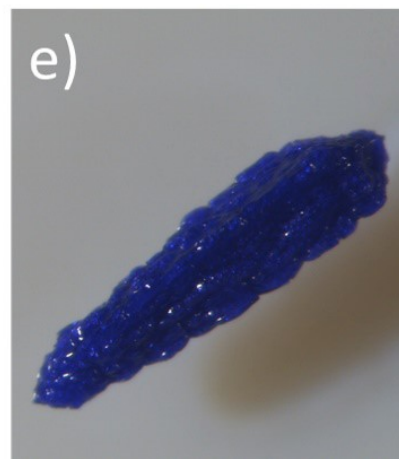

Supplement: d4dt02679a7.pdf [file d4dt02679a7.pdf]

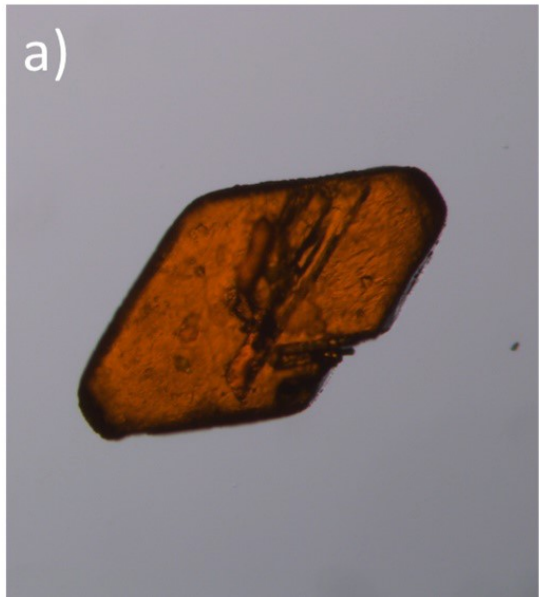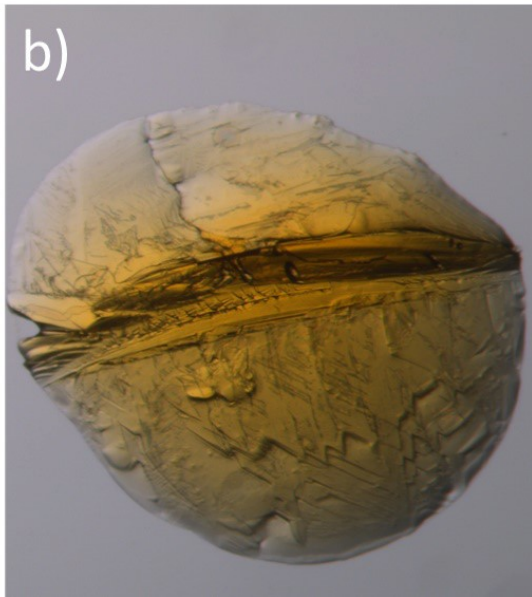

Supplement: d4dt02679a8.pdf [file d4dt02679a8.pdf]

a)

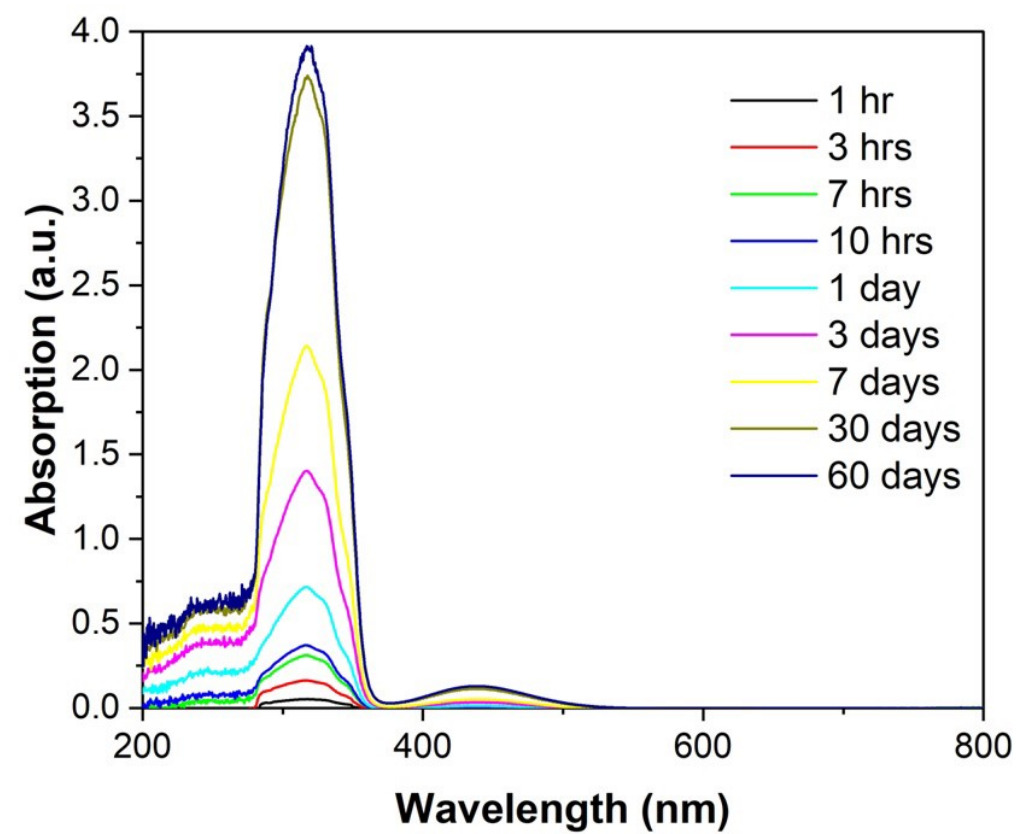

b)

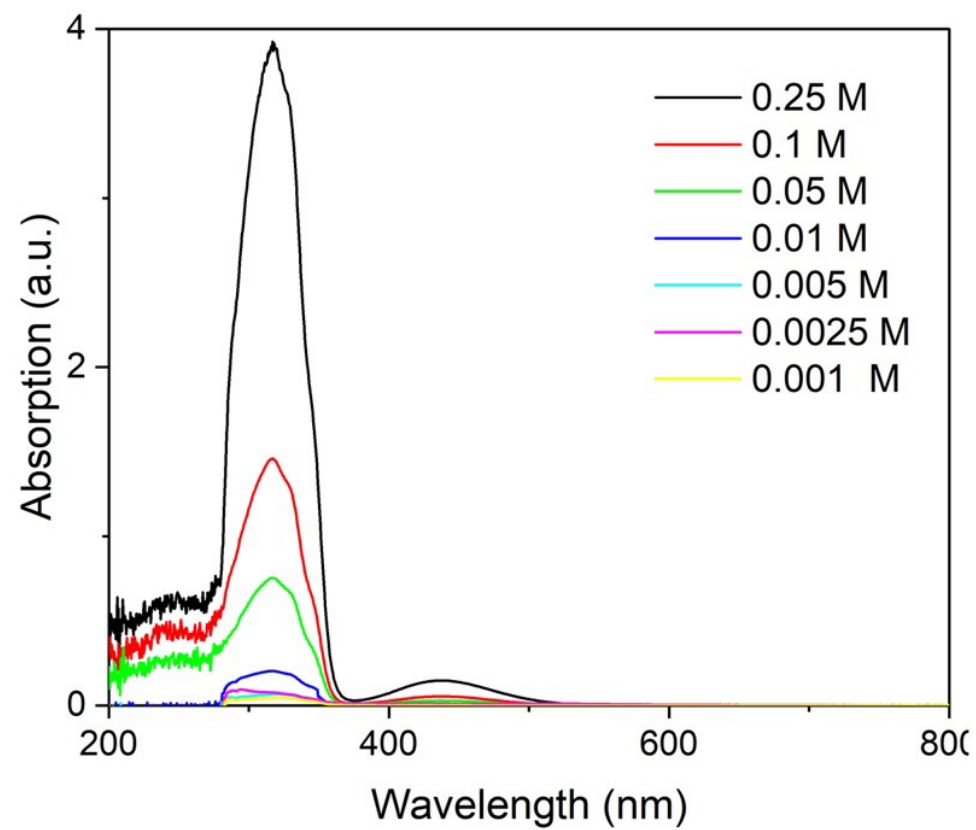

c)

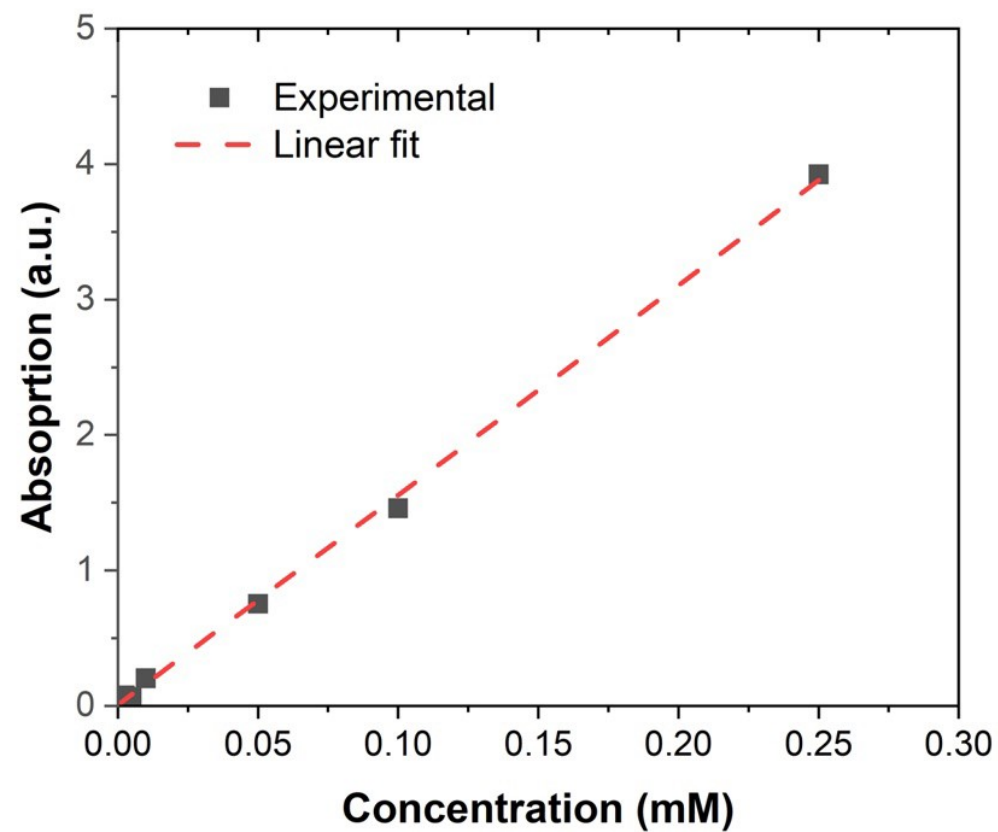

Supplement: d4dt02679a9.pdf [file d4dt02679a9.pdf]
